# Enhancing CO<sub>2</sub>-valorization using *Clostridium autoethanogenum* for sustainable fuel and chemicals production

1 James K. Heffernan<sup>1&</sup>, Kaspar Valgepea<sup>1,2&</sup>, Renato de Souza Pinto Lemgruber<sup>1</sup>,  
2 Isabella Casini<sup>3</sup>, Manuel Plan<sup>4</sup>, Ryan Tappel<sup>5</sup>, Sean D. Simpson<sup>5</sup>, Michael Köpke<sup>5</sup>,  
3 Lars K. Nielsen<sup>1,4</sup>, Esteban Marcellin<sup>1,4\*</sup>

4 <sup>1</sup>Australian Institute for Bioengineering and Nanotechnology, The University of  
5 Queensland, Building 75, Corner College Rd & Cooper Rd, St. Lucia 4067, QLD,  
6 Australia.

7 <sup>2</sup>ERA Chair in Gas Fermentation Technologies, Institute of Technology, University of  
8 Tartu, Nooruse 1, 50411 Tartu, Estonia.

9 <sup>3</sup>Center for Applied Geosciences, University of Tübingen, Hölderlinstr. 12, 72074,  
10 Tübingen, Germany.

11 <sup>4</sup>Queensland Node of Metabolomics Australia, The University of Queensland, Building  
12 75, Corner College Rd & Cooper Rd, St. Lucia 4067, QLD, Australia.

13 <sup>5</sup>LanzaTech Inc., 8045 Lamon Ave Suite 400, Skokie, IL 60077, USA.

14 \* **Correspondence:**  
15 Corresponding author  
16 [e.marcellin@uq.edu.au](mailto:e.marcellin@uq.edu.au)

17 & **Equal contributors**

18 **Keywords:** gas fermentation, *Clostridium autoethanogenum*, carbon dioxide,  
19 valorization, carbon recycling, fuel and chemical platforms.

## 20 Abstract

21 Acetogenic bacteria can convert waste gases into fuels and chemicals. Design of  
22 bioprocesses for waste carbon valorization requires quantification of steady-state carbon  
23 flows. Here, steady-state quantification of autotrophic chemostats containing  
24 *Clostridium autoethanogenum* grown on CO<sub>2</sub> and H<sub>2</sub> revealed that captured carbon (460  
25 ± 80 mmol/gDCW/day) had a significant distribution to ethanol (54 ± 3 mol% with a  
26 2.4 ± 0.3 g/L titer). We were impressed with this initial result, but also observed  
27 limitations to biomass concentration and growth rate. Metabolic modelling predicted  
28 culture performance and indicated significant metabolic adjustments when compared to  
29 fermentation with CO as the carbon source. Moreover, modelling highlighted flux to  
30 pyruvate, and subsequently reduced ferredoxin, as a target for improving CO<sub>2</sub> and H<sub>2</sub>  
31 fermentation. Supplementation with a small amount of CO enabled co-utilisation with  
32 CO<sub>2</sub>, and enhanced CO<sub>2</sub> fermentation performance significantly, while maintaining an  
33 industrially relevant product profile. Additionally, the highest specific flux through the  
34 Wood-Ljungdahl pathway was observed during co-utilization of CO<sub>2</sub> and CO.

## Enhancing CO<sub>2</sub>-valorization using *Clostridium autoethanogenum* for sustainable fuel and chemicals production

35 Furthermore, the addition of CO led to superior CO<sub>2</sub>-valorizing characteristics ( $9.7 \pm$   
36  $0.4$  g/L ethanol with a  $66 \pm 2$  mol% distribution, and  $540 \pm 20$  mmol CO<sub>2</sub>/gDCW/day).  
37 Similar industrial processes are commercial or currently being scaled up, indicating CO-  
38 supplemented CO<sub>2</sub> and H<sub>2</sub> fermentation has high potential for sustainable fuel and  
39 chemical production. This work also provides a reference dataset to advance our  
40 understanding of CO<sub>2</sub> gas fermentation, which can contribute to mitigating climate  
41 change.

### 42 Introduction

43 Gas fermentation has attractive waste carbon valorization properties, for which the need  
44 is intensifying (Emerson and Stephanopoulos, 2019; IPCC, 2014). Recently, LanzaTech  
45 commercialized the first waste gas-to-ethanol process, efficiently incorporating the  
46 carbon from steel mill off-gas into fuel quality ethanol *via* the model acetogen  
47 *Clostridium autoethanogenum*. The key carbon source — carbon monoxide (CO) —  
48 accounts for a significant portion of steel mill off-gas and synthesis gas (syngas), which  
49 can be generated from multiple high-volume, non-gaseous waste feedstocks (e.g.  
50 biomass, municipal solid waste) (Liew et al., 2016). Therefore, LanzaTech's process is  
51 significant in that it valorizes waste carbon by fusing two one-carbon gas molecules  
52 (C1) into liquid fuel. Furthermore, Handler et al. (2016) found that ethanol produced by  
53 LanzaTech's process reduced greenhouse gas emissions by 67 to 98% when compared  
54 to petroleum gasoline on an energy content and “cradle-to-grave” basis (feedstock  
55 dependent). Carbon dioxide (CO<sub>2</sub>) represents a more diverse and plentiful waste stream  
56 compared to CO (International Panel on Climate Change (IPCC), 2014), thus  
57 embodying a feedstock with greater climate change mitigation and carbon recycling  
58 potential.

59 Increasing acetogenic carbon capture as CO<sub>2</sub> would build on the success of commercial  
60 gas fermentation and continue the expansion of the technology as a platform for  
61 sustainable chemical production (Bengelsdorf et al., 2018; Müller, 2019; Redl et al.,  
62 2017). Compared to other CO<sub>2</sub> valorization methods, acetogens are ideal candidates due  
63 to their high metabolic efficiency, ability to handle variable gas compositions, high  
64 product specificity, scalability, and low susceptibility to poisoning by sulphur, chlorine,  
65 and tars (Artz et al., 2018; Liew et al., 2016). However, metabolism of CO<sub>2</sub> requires an  
66 energy source, for which some see an appropriate solution is lacking (Emerson and  
67 Stephanopoulos, 2019).

68 Gas fermenting acetogens harbor the Wood-Ljungdahl pathway (WLP) (Drake et al.,  
69 2008), a non-photosynthetic C1-fixation metabolic pathway with the highest-known  
70 theoretical thermodynamic efficiency (Fast and Papoutsakis, 2012; Müller, 2019;  
71 Schuchmann and Müller, 2014). Various potential energy sources exist for metabolizing  
72 CO<sub>2</sub>, primarily hydrogen, nitrates, sugars, and arginine. Yet, acetogenic CO<sub>2</sub>  
73 valorization, which is actively being developed for industrial implementation (Tizard  
74 and Sechrist, 2015), poses challenges along with promise. These include potential  
75 adenosine triphosphate (ATP) starvation in autotrophic conditions and carbon catabolite  
76 repression in hetero/mixotrophic conditions (Emerson and Stephanopoulos, 2019).

77 Hydrogen (H<sub>2</sub>) is the most recognized energy source for CO<sub>2</sub> utilization — as  
78 metabolism of sugars or nitrates cause shifts in metabolism that result in lower CO<sub>2</sub> or

## Enhancing CO<sub>2</sub>-valorization using *Clostridium autoethanogenum* for sustainable fuel and chemicals production

79 H<sub>2</sub> utilization (Emerson and Stephanopoulos, 2019 & Liew et al., 2016). H<sub>2</sub> production  
80 will also logically transition to renewable sources in the future, whereas production of  
81 sugars and nitrates are dependent on less-sustainable methods. Furthermore, levelized  
82 cost predictions for solar H<sub>2</sub> indicate a 30% reduction by 2030, potentially becoming  
83 competitive with the current levelized cost of fossil fuel derived H<sub>2</sub> by 2035 (Detz et al.,  
84 2018; Glenk and Reichelstein, 2019). This is in part due to rapidly decreasing solar  
85 electricity costs (IRENA, 2017) and projections of H<sub>2</sub> electrolysis technology  
86 development (Detz et al., 2018; Glenk and Reichelstein, 2019). Similarly, atmospheric  
87 CO<sub>2</sub> capture *via* direct air contact showed promising feasibility recently (Keith et al.,  
88 2018), which represents an essential development for carbon recycling (Otto et al.,  
89 2015). Various power-to-gas technologies are being discussed for mediating  
90 fluctuations in renewable power generation (Götz et al., 2016). By extension, gas  
91 fermentation to liquid products could couple mediation of renewable power fluctuations  
92 to carbon recycling (Redl et al., 2017). This provides an attractive new opportunity for  
93 bacterial artificial-photosynthesis, whereby renewable H<sub>2</sub> supplementation facilitates  
94 acetogenic CO<sub>2</sub> valorization (Claassens et al., 2016; Haas et al., 2018).

95 Continuous culture bioprocesses are preferable to batch or fed-batch fermentation  
96 bioprocesses (Hoskisson and Hobbs, 2005). Furthermore, systems-level quantification is  
97 essential for design-build-test-learn bioprocess optimization by metabolic engineering  
98 (Valgepea et al., 2017). Therefore, obtaining quantitative datasets from steady-state  
99 chemostat cultures, whose analyses are comparable between experiments, is important  
100 for development of these systems (Adamberg et al., 2015). Whilst Bengelsdorf et al.  
101 (2018) reviewed autotrophic acetogen growth on CO<sub>2</sub> and H<sub>2</sub> (CO<sub>2</sub>+H<sub>2</sub>), and Mock et  
102 al. (2015) provided notable insight into the CO<sub>2</sub>+H<sub>2</sub> metabolism of *C.*  
103 *autoethanogenum*, the literature lacks a steady-state dataset where carbon flows in a  
104 CO<sub>2</sub>+H<sub>2</sub> fermentation are quantified. Here we aimed to quantify steady-state CO<sub>2</sub>+H<sub>2</sub>  
105 fermentation using fully instrumented chemostats and the model acetogen *C.*  
106 *autoethanogenum*. Subsequently, we showed that CO<sub>2</sub> is a promising feedstock  
107 alternative to CO, as more than half of the substrate CO<sub>2</sub> carbon was converted into  
108 ethanol. Furthermore, supplementation with CO at low concentrations improved  
109 fermentation performance significantly.

## 110 **Materials and Methods**

### 111 **Bacterial strain, growth medium, and continuous culture conditions**

112 A derivative of *Clostridium autoethanogenum* DSM 10061 strain—DSM 19630—  
113 deposited in the German Collection of Microorganisms and Cell Cultures (DSMZ) was  
114 used in all experiments and stored as glycerol stocks at - 80 °C. This non-commercial  
115 strain was grown on CO<sub>2</sub>+H<sub>2</sub> (~23% CO<sub>2</sub>, ~67% H<sub>2</sub> and ~10% Ar; BOC Australia) and  
116 CO/CO<sub>2</sub>/H<sub>2</sub> (~2% CO, ~23% CO<sub>2</sub>, ~65% H<sub>2</sub>, and ~10% Ar; BOC Australia) in  
117 chemically defined medium (Valgepea et al., 2017). Cells were grown under strictly  
118 anaerobic conditions at 37 °C and at a pH of 5 (maintained by 5 M NH<sub>4</sub>OH). Chemostat  
119 continuous culture achieved steady-states at dilution rates (D) = 0.47 ± 0.01 (CO<sub>2</sub>+H<sub>2</sub>;  
120 specific growth rate (μ) = 0.0196 ± 0.0004 [average ± standard deviation]), 0.5 ± 0.01,  
121 and 1 ± 0.01 day<sup>-1</sup> (CO/CO<sub>2</sub>/H<sub>2</sub>; μ = 0.021 ± 0.0004, and 0.042 ± 0.0008 h<sup>-1</sup>  
122 respectively). See Table 1 for steady-state gas-liquid mass transfer rate data. The steady-  
123 state results reported here were collected after optical density (OD), gas uptake and

## Enhancing CO<sub>2</sub>-valorization using *Clostridium autoethanogenum* for sustainable fuel and chemicals production

124 production rates had been stable in chemostat mode for at least three working volumes.  
125 See Valgepea et al. (2017a) for details on equipment.

### 126 **Experimental analysis**

#### 127 **Biomass concentration and extracellular metabolome analyses**

128 Biomass concentration (gDCW/L) was estimated and extracellular metabolome analysis  
129 carried out as specified in Valgepea et al. (2018).

#### 130 **Bioreactor off-gas analysis**

131 Bioreactor off-gas was analyzed by an online Hiden HPR-20-QIC mass spectrometer.  
132 The Faraday Cup detector monitored the intensities of H<sub>2</sub>, CO, ethanol, H<sub>2</sub>S, Ar, and  
133 CO<sub>2</sub> at 2, 14, 31, 34, 40, and 44 amu, respectively, in the bioreactor off-gas. These  
134 masses were chosen so that each target compound would be represented by a unique  
135 signal. This was determined to be essential to achieve the highest confidence in  
136 quantification using preliminary experiments as interferences from other compounds at  
137 a shared mass could not be reliably accounted for (e.g. the more intense signal from CO  
138 at 28 amu could not be used due to the uncertainty of interference at 28 amu from the  
139 CO<sub>2</sub> fragment). Gas from the cylinder was used as the calibration gas for each MS-cycle  
140 (i.e. ‘online calibration’) to achieve reliable off-gas analysis (Valgepea et al., 2017). See  
141 below for details on quantification of gas uptake and production rates.

#### 142 **Quantification**

##### 143 **Gas uptake and production rates**

144 Gas uptake (CO, CO<sub>2</sub> and H<sub>2</sub>) and production (ethanol) were determined using “online  
145 calibration” of the MS by analyzing the respective feed gas directly from the cylinder  
146 after each analysis cycle of the bioreactors. Specific rates (mmol/gDCW/h) were  
147 calculated by taking into account the exact composition of the respective gas, bioreactor  
148 liquid working volume, feed gas flow rate, off-gas flow rate (based on the fractional  
149 difference of the inert gas [Ar] in the feed and off-gas composition), the molar volume  
150 of ideal gas, and the steady-state biomass concentration.

##### 151 **Carbon balance analysis**

152 The carbon balances were determined at  $116 \pm 11\%$ ,  $103 \pm 12\%$ , and  $108 \pm 11\%$  for  
153 CO<sub>2</sub>+H<sub>2</sub>, and CO/CO<sub>2</sub>/H<sub>2</sub> at D = 0.5 and 1 day<sup>-1</sup> respectively (total C-mol products/total  
154 C-mol substrates), as specified in Valgepea et al. (2017).

##### 155 **Genome-scale metabolic modelling with GEM iCLAU786**

156 Model simulations were performed using genome scale model (GEM) iCLAU786 of *C.*  
157 *autoethanogenum* and flux balance analysis (FBA) (Orth and Palsson, 2011) as  
158 specified in Valgepea et al. (2018). Briefly, we used FBA to estimate intracellular fluxes  
159 (SIM1–26) and predict “optimal” growth phenotypes for experimental conditions  
160 (SIM27–62) using either maximization of ATP dissipation or biomass yield,  
161 respectively, as the objective function. Complete simulation results identified as SIMx

## Enhancing CO<sub>2</sub>-valorization using *Clostridium autoethanogenum* for sustainable fuel and chemicals production

162 (e.g. SIM1) in the text are in Supplementary Files. SIM1-19, 27-41, and 49-55 are from  
163 Valgepea et al. (2018). In addition to details described in Valgepea et al. (2018), CO<sub>2</sub>  
164 reduction to formate was forced from the formate dehydrogenase (FdhA) reaction  
165 scheme (rxn00103\_c0, SIM17-30) to the FdhA/Hydrogenase ABCDE complex  
166 (HytABCDE) reaction scheme (rxn08518\_c0, SIM31-40) when maximizing for  
167 biomass formation, as described by Mock et al. (2015). SIM56-62 also stopped export  
168 of pyruvate (rxn05469\_c0), a decision validated by HPLC data.

### 169 Results

#### 170 *Clostridium autoethanogenum* steady-state fermentation of carbon dioxide and 171 hydrogen

172 *Clostridium autoethanogenum* cells reached steady-state when growing on CO<sub>2</sub>+H<sub>2</sub> in  
173 chemostats at dilution rate (D) ~0.5 day<sup>-1</sup> (specific growth rate (μ) ~0.02 h<sup>-1</sup>) with a  
174 biomass concentration of 0.18 ± 0.02 g dry cell weight (gDCW)/L (Figure 1A). It is  
175 important to note that attempts to reach a steady-state at D = 1 day<sup>-1</sup> were unsuccessful.  
176 Unlike the chemostat cultures of *C. autoethanogenum* with CO (Valgepea et al., 2018;  
177 2017a) and CO<sub>2</sub>+H<sub>2</sub> retentostat cultures (Mock et al., 2015), the CO<sub>2</sub>+H<sub>2</sub> cultures could  
178 not reach stable biomass concentrations before the culture began oscillation cycles;  
179 previously observed above ~1.6 gDCW/L (Valgepea et al., 2017). The physiological  
180 reason and mechanism for such oscillatory culture behavior are under investigation, but  
181 we assumed that cell recycling is a requirement for CO<sub>2</sub>+H<sub>2</sub> culture stability. For  
182 example, Molitor et al. (2019) showed consistent, high-biomass concentration and high-  
183 acetate CO<sub>2</sub>+H<sub>2</sub> fermentation with *Clostridium ljungdahlii* in a retentostat with  
184 complete recycling.

185 Despite the attempt to reach a steady-state at D = 1 day<sup>-1</sup>, cells reached steady-state at  
186 dilution rate = 0.5 day<sup>-1</sup>. Under those conditions, the specific production rates of ethanol  
187 and acetate were 140 ± 10 and 113 ± 9 mmol/gDCW/day, respectively (Figure 1C).  
188 Strikingly, the specific rate of carbon incorporation (i.e. qCO<sub>2</sub>) was 480 ± 80  
189 mmol/gDCW/day (Figure 1B), and around half of that carbon was captured as ethanol  
190 (54 ± 3 mol%) (Figure 1D). Fermentation conditions and titers are available in Table 1,  
191 showing an impressive ethanol concentration compared to previous fermentations where  
192 CO was the main carbon and energy source.

193 Despite the different dilution rate, the CO<sub>2</sub>+H<sub>2</sub> results generated were compared to  
194 previously published chemostat cultures of *C. autoethanogenum* grown on CO, syngas,  
195 and CO+H<sub>2</sub> (Valgepea et al., 2018) at similar biomass concentrations (~0.5 gDCW/L)  
196 (Figure 1B, C & D). Specific rates of acetate and ethanol production achieved here for  
197 CO<sub>2</sub>+H<sub>2</sub> cultures fell between those for syngas (■) and CO+H<sub>2</sub> (■) cultures (Figure 1B  
198 & D). However, the specific rate of carbon incorporation was higher for CO<sub>2</sub>+H<sub>2</sub>  
199 (Figure 1C). We found that more than half of the captured CO<sub>2</sub> was converted into  
200 ethanol (Figure 1D). These results were encouraging, especially as ethanol production  
201 has unfavorable stoichiometry compared to acetate (Mock et al., 2015). Furthermore,  
202 the H<sub>2</sub> specific uptake rate (1130 ± 160 mmol/gDCW/day) showed that higher H<sub>2</sub>  
203 uptake rates are achievable (compared to old datasets). These results show that higher  
204 carbon yields are possible (Valgepea et al., 2018). To further investigate the metabolic  
205 demand and the feasibility of CO<sub>2</sub>+H<sub>2</sub> fermentation, we utilized the steady-state dataset

## Enhancing CO<sub>2</sub>-valorization using *Clostridium autoethanogenum* for sustainable fuel and chemicals production

206 as constraints for the GEM to find candidate mechanisms for improving CO<sub>2</sub>+H<sub>2</sub>  
207 fermentation using iCLAU786.

### 208 **Metabolic model of carbon dioxide and hydrogen fermentation**

209 Estimation of intracellular processes constrained by *in vivo* datasets represents an  
210 important developmental step for progressing acetogenic CO<sub>2</sub> valorization. Here, for  
211 instance, comparing CO<sub>2</sub>+H<sub>2</sub> and CO-containing fermentation fluxes was possible  
212 (Figure 2). See Supplementary Files for complete details.

213 Intracellular metabolite fluxes from the FBA showed remarkable similarity to the  
214 combined theoretical stoichiometry of acetate and ethanol production (Mock et al.,  
215 2015) and indicated energetic cofactor circuits with mapping close to 1:1  
216 (experimental:theoretical stoichiometry; Supplementary Files). Ethanol production  
217 likely occurred *via* acetaldehyde:ferredoxin oxidoreductase (AOR; leq000004) under  
218 autotrophic conditions, with the HytABCDE (leq000001) and Nfn complex (leq000002)  
219 likely facilitating cofactor production *via* electron bifurcation (Figure 2) (Valgepea et  
220 al., 2018). This is a mechanism for minimization of free energy loss employed by *C.*  
221 *autoethanogenum* and may play a key role in sustaining proton motive force by  
222 balancing acetate, ethanol, and ATP production (Mock et al., 2015; Valgepea et al.,  
223 2018). Engineering acetogens to redirect this energy towards cellular growth, sacrificing  
224 some ethanol production, could be beneficial for CO<sub>2</sub> fermentation (Emerson and  
225 Stephanopoulos, 2019).

226 It was notable that, unlike CO fermentations, the pyruvate:ferredoxin oxidoreductase  
227 (PFOR; rxn05938\_c0; acetyl-CoA ↔ pyruvate) flux was not significantly in the  
228 direction of pyruvate (Figure 2) (Valgepea et al., 2018). Under autotrophic conditions,  
229 PFOR links the WLP to anabolic pathways associated with biomass (Furdui and  
230 Ragsdale, 2000), and therefore this indicated high cell-specific energetic limitation.  
231 From this observation, we hypothesized that CO supplementation could provide a  
232 potential solution, as CO oxidation would generate Fd<sub>red</sub>. Furthermore, an ATP/H<sub>2</sub> flux  
233 ratio of ~0.15 was observed here compared to an ATP/CO ratio of ~0.28 in CO only  
234 fermentations (Valgepea et al., 2018). Considering CO+H<sub>2</sub> and CO<sub>2</sub>+H<sub>2</sub> fermentations  
235 had equal carbon-flux through the WLP (~10 mmol/gDCW/h; Figure 2),  
236 supplementation with renewable CO from CO<sub>2</sub> electrolysis could control biomass  
237 formation and culture stability. A similar process (but CO fermentation) was detailed by  
238 Haas et al. (2018).

### 239 ***Clostridium autoethanogenum* steady-state fermentation of carbon dioxide and 240 hydrogen supplemented with carbon monoxide**

241 To validate our modelling hypothesis, *Clostridium autoethanogenum* was cultured with  
242 a low concentration of carbon monoxide in addition to CO<sub>2</sub> and H<sub>2</sub> (CO/CO<sub>2</sub>/H<sub>2</sub>) in  
243 chemostats. A steady-state was reached at D = 0.5 day<sup>-1</sup> (μ ~0.02 h<sup>-1</sup>), and at D = 1 day<sup>-1</sup>  
244 (μ ~0.04 h<sup>-1</sup>; Figure 1A; biomass concentrations of 0.54 ± 0.01 and 0.34 ± 0.02  
245 gDCW/L respectively). CO/CO<sub>2</sub>/H<sub>2</sub> fermentations at a D = 1 day<sup>-1</sup> (CO/CO<sub>2</sub>/H<sub>2</sub><sup>1</sup>) and a  
246 D = 0.5 day<sup>-1</sup> (CO/CO<sub>2</sub>/H<sub>2</sub><sup>0.5</sup>) showed simultaneous uptake of CO (89 ± 2 and 36 ± 4  
247 mmol/gDCW/day, respectively) and CO<sub>2</sub> (940 ± 20 and 540 ± 20 mmol/gDCW/day,  
248 respectively) (Figure 1B). The co-utilization of both C1 gases is, to the best of our

## Enhancing CO<sub>2</sub>-valorization using *Clostridium autoethanogenum* for sustainable fuel and chemicals production

249 knowledge, an unquantified phenomenon. This led to a specific carbon incorporation  
250 (CO/CO<sub>2</sub>/H<sub>2</sub><sup>1</sup> – 1030 ± 30 mmol/gDCW/day) larger than any other gas type (maximum  
251 of ~450 mmol/gDCW/day for fermentations with CO in Valgepea et al. (2018) or  
252 CO<sub>2</sub>+H<sub>2</sub> in this work). This also resulted in significant improvements to culture  
253 performance compared to CO<sub>2</sub>+H<sub>2</sub> fermentations.

254 Compared to CO<sub>2</sub>+H<sub>2</sub>, CO/CO<sub>2</sub>/H<sub>2</sub><sup>0.5</sup> showed higher acetate and ethanol titers (Table 1)  
255 and specific productivities (Figure 1C), and a higher ethanol/acetate ratio (2.15 vs 1.24  
256 mol/mol respectively). While at a similar biomass concentration (CO/CO<sub>2</sub>/H<sub>2</sub><sup>1</sup> best  
257 comparison due to similarity in dilution rate), acetate and ethanol titers (Table 1), and  
258 specific productivities (Figure 1C) are greater than during fermentation of other CO-  
259 containing gases. When comparing to high biomass (~1.4 gDCW/L) CO cultures, CO-  
260 supplementation still performs impressively – CO+H<sub>2</sub> fermentation achieved a higher  
261 ethanol titer (11.6 ± 0.4 g/L), while CO and syngas fermentations were similar (3.9 ±  
262 0.2 and 5.4 ± 0.3 g/L respectively). Otherwise, all specific productivities were higher for  
263 CO/CO<sub>2</sub>/H<sub>2</sub><sup>1</sup> (Supplementary Files). Furthermore, the distribution of carbon to ethanol  
264 was still greater than 50% (Figure 1D; 53.8 ± 0.4 % and 66 ± 2% for CO/CO<sub>2</sub>/H<sub>2</sub><sup>1</sup> and  
265 CO/CO<sub>2</sub>/H<sub>2</sub><sup>0.5</sup> respectively).

266 To understand the metabolic effects of supplementing CO, FBA was performed using  
267 the same conditions and alterations as for CO<sub>2</sub>+H<sub>2</sub> (Figure 2). Notably, the WLP  
268 specific flux throughput for CO/CO<sub>2</sub>/H<sub>2</sub><sup>1</sup> was ~2-fold greater than for any other gas type  
269 (including high-biomass [Valgepea et al., 2018]). Furthermore, for CO<sub>2</sub> fermentations,  
270 Nfn complex flux direction was opposite that of CO and syngas fermentations.  
271 CO/CO<sub>2</sub>/H<sub>2</sub><sup>0.5</sup> also showed significantly greater flux through the AOR, whilst specific  
272 WLP productivity was insignificantly different compared to CO<sub>2</sub>+H<sub>2</sub>.

### 273 Discussion

274 Achieving steady-state continuous cultures using CO<sub>2</sub>+H<sub>2</sub> mixtures, without cell  
275 recycling here, was challenging. Yet, compared to other organisms fermenting CO<sub>2</sub>+H<sub>2</sub>  
276 with continuous medium exchange, *Clostridium autoethanogenum* performs well (Table  
277 2). No direct comparisons can be made to other experiments due to variations in  
278 conditions, but *C. autoethanogenum* clearly achieves the highest ethanol production,  
279 with comparable quantities of carbonous products also. *Acetobacterium woodii*, along  
280 with *Sporomusa ovata*, were shown to perform well when compared to a wide range of  
281 acetogens under batch CO<sub>2</sub>+H<sub>2</sub> conditions (Groher and Weuster-Botz, 2016). Yet, as  
282 evidenced by omission of *S. ovata* from Table 2, few continuous culture  
283 characterizations of acetogens are available – an essential step for validation of  
284 industrial robustness in gas fermentation. As discussed by Molitor et al. (2019), the lack  
285 of yeast extract or C<sub>>2</sub> substrates is also distinguishing between fermentations.

286 Notably, CO<sub>2</sub>+H<sub>2</sub> cultures displayed higher variability between biological replicates  
287 compared to those of CO-containing gas mixtures (Figure 1) (Valgepea et al., 2017).  
288 This may indicate variable organism fitness, a trait previously discussed for *C.*  
289 *autoethanogenum* by Liew et al. (2016), who extensively covered numerous techniques  
290 used for enhancing gas fermentation including – coupling to other processes, adaptive  
291 laboratory evolution, and metabolic engineering of acetogens using genetic tools. CO-  
292 supplementation could be a valuable option for enhancement as it overcomes inherent

## Enhancing CO<sub>2</sub>-valorization using *Clostridium autoethanogenum* for sustainable fuel and chemicals production

293 problems linked to engineering acetogens. Supplementation of low quantities of CO  
294 here stabilized the culture, enabled culturing at  $D = 1 \text{ day}^{-1}$ , and achieved higher biomass  
295 concentration with a carbon incorporation larger than any other gas type – all without  
296 compromising by-product distribution.

297 While Valgepea et al. (2018) found that syngas fermentation lead to CO-only  
298 fermentation at steady-state, we observed co-utilization of CO and CO<sub>2</sub>. Tizard and  
299 Sechrist (2015) have also shown co-utilization for *C. autoethanogenum* continuous  
300 cultures, and it seems that co-uptake may also occur for some points of syngas batch  
301 fermentation ([preprint] Infantes et al., 2020). Co-utilization of sugars was found for *E.*  
302 *coli* in chemostats – where inhibition of consumption, but no change in induction time  
303 was observed (Standing et al., 1972). The WLP is most likely no different, in that  
304 metabolism of CO is preferential, yet the pathway can co-consume CO<sub>2</sub> under certain  
305 conditions.

306 Various efforts have been made towards enhancing CO<sub>2</sub>(+H<sub>2</sub>) fermentation to C<sub>2-2</sub>  
307 products (Table 2) (Emerson and Stephanopoulos, 2019). Braun and Gottschalk (1981)  
308 first discovered the potential for enhancement when *Acetobacterium woodii*  
309 simultaneously consumed fructose and a headspace of CO<sub>2</sub>+H<sub>2</sub> during batch cultivation.  
310 Growth and acetate production was high but no characterization of the headspace was  
311 performed. More recently, continuous glucose-supplemented CO<sub>2</sub>+H<sub>2</sub> fermentation of  
312 *Moorella thermoacetica* by Park et al. (2019) did not lead to net uptake of CO<sub>2</sub>.  
313 Furthermore, Jones et al. (2016) did not show net CO<sub>2</sub> uptake for a wide range of  
314 acetogens (not *A. woodii*) fermenting syngas and fructose. *A. woodii* generates a sodium  
315 ion (Na<sup>+</sup>) gradient (Hess et al., 2013) rather than a proton (H<sup>+</sup>) gradient for membranous  
316 ATP generation (Bengelsdorf et al., 2018; Pierce et al., 2008; Poehlein et al., 2015).  
317 This may highlight an important metabolic difference from other model acetogens –  
318 decoupling the resources of the WLP and membranous ATP generation pathways could  
319 facilitate fermentation of sugar and CO<sub>2</sub>+H<sub>2</sub> simultaneously.

320 Other enhancements have also struggled to achieve net CO<sub>2</sub> uptake. Co-culture of *C.*  
321 *acetobutylicum* and *C. ljungdahlii* showed syntrophic metabolic coupling when  
322 fermenting glucose, fructose, and CO<sub>2</sub>+H<sub>2</sub>, but no net CO<sub>2</sub> uptake (Charubin and  
323 Papoutsakis, 2019). Addition of nitrate to batch CO<sub>2</sub>+H<sub>2</sub> fermentation by *C. ljungdahlii*,  
324 increased biomass concentration and subsequently volumetric productivity of acetate  
325 (Emerson et al., 2019). However, the specific WLP productivity decreased, meaning  
326 lower utilization of CO<sub>2</sub>. Other organisms not recognized as gas fermenters can also use  
327 mixotrophy to minimize carbon loss, such as *Clostridium beijerinckii* but have not  
328 displayed net CO<sub>2</sub> uptake either (Sandoval-Espinola et al., 2017). To the best of our  
329 knowledge, this is the first report where supplementation of a substrate other than H<sub>2</sub>,  
330 increased productivities of continuous acetogenic CO<sub>2</sub> fermentation while maintaining  
331 net CO<sub>2</sub> utilization. Furthermore, the effect of CO supplementation on CO<sub>2</sub> utilization  
332 was superlinear, indicating a synergistic mechanism (Park et al., 2019). This is  
333 encouraging for development of bioprocesses valorizing CO<sub>2</sub>.

334 Comparisons between fermentation datasets enables us to speculate about the positive  
335 effect of CO-supplementation on CO<sub>2</sub>+H<sub>2</sub> fermentation. Although, addition of CO led to  
336 minimal metabolic shifts (Figure 2 – CO<sub>2</sub>+H<sub>2</sub> vs CO/CO<sub>2</sub>/H<sub>2</sub><sup>0.5</sup> and Supplementary  
337 Files), FBA showed that CO supplementation caused significant increases to the



## Enhancing CO<sub>2</sub>-valorization using *Clostridium autoethanogenum* for sustainable fuel and chemicals production

338 reduced ferredoxin consumption by AOR and Rnf complex (leq000004 and M002,  
339 respectively) compared to CO<sub>2</sub>+H<sub>2</sub> (Figure 2). The overflow model proposed by Richter  
340 et al. (2016) suggests that high NADH production *via* Rnf and Nfn complexes  
341 (leq000002) is also important for reducing AOR product inhibition. In this way, NADH  
342 facilitates fast metabolism of acetaldehyde to ethanol *via* alcohol dehydrogenase  
343 (Adh(E); rxn00543\_c0). Decreasing the acetate concentration reduces acidification and  
344 the ATP cost for excreting acetate (Valgepea et al., 2018). Including acetaldehyde  
345 conversion to ethanol and association to acetic acid, this also leads to consumption of 2  
346 H<sup>+</sup> (4 here vs 2 produced *via* CODH). Therefore, CO consumption decreases the  
347 intracellular H<sup>+</sup> pool, and following Le Chatelier's principle, drives HytABCDE  
348 activity. Indeed, the change in specific H<sub>2</sub> uptake relative to specific CO<sub>2</sub> uptake is  
349 greater than that of CO (for CO<sub>2</sub>+H<sub>2</sub> vs CO/CO<sub>2</sub>/H<sub>2</sub> at D = 0.5 day<sup>-1</sup>, Supplementary  
350 Files). Subsequently, the relative gain in free energy from H<sub>2</sub> is ~ 4-fold greater than  
351 CO. We speculate this is ultimately responsible for the improved fitness of CO-  
352 supplemented CO<sub>2</sub>+H<sub>2</sub> fermentation by *C. autoethanogenum*. We propose the following  
353 five critical factors to this enhanced metabolism: [1] metabolism of CO increases the  
354 intracellular pool of reduced ferredoxin; [2] this stimulates oxidation of ferredoxin,  
355 which if consumed by the AOR; [3] reduces ATP costs; and [4] decreases the H<sup>+</sup>  
356 pool/acidification; which therefore [5] drives H<sub>2</sub> uptake for further reduction of  
357 ferredoxin. Evidently, additional understanding of acetogenic redox metabolism, from a  
358 thermodynamic perspective, is important for developing acetogenic CO<sub>2</sub>-valorization as  
359 a platform industrial bioprocess (Cueto-Rojas et al., 2015).

360 Physicochemical properties could also play a key role in CO-supplementation enabling  
361 to achieve a stable CO<sub>2</sub>+H<sub>2</sub> chemostat culture at D = 1 day<sup>-1</sup>. Generation of a stable and  
362 large non-equilibrium is what drives microbial growth (Igamberdiev and Kleczkowski,  
363 2009; Qian and Beard, 2005; Quéméner and Bouchez, 2014) and gas-liquid mass  
364 transfer (Ma et al., 2005). For continuous culture of gas fermenting microbes, an  
365 inherent relationship between substrate mass transfer and culture growth exists  
366 (Supplementary Files). An important parameter for these systems is the Gibb's free  
367 energy of a system (Cueto-Rojas et al., 2015). This describes the thermodynamic  
368 favorability of the reaction system – termed spontaneity. Here, analysis of experimental  
369 flux and Gibbs free energy suggests that CO<sub>2</sub>+H<sub>2</sub> fermentation is infeasible ( $\Delta\hat{G}_{OR}^0 =$   
370  $5.4 \text{ kJ/mol/day}$ ), whereas CO-supplemented CO<sub>2</sub>+H<sub>2</sub> fermentation is feasible  
371 ( $\Delta\hat{G}_{OR}^0 = -12.3 \text{ kJ/mol/day}$ ; Supplementary Files). Though these calculations use  
372 standard conditions, they do indicate how close CO<sub>2</sub>+H<sub>2</sub> fermentation is to the  
373 thermodynamic limit of metabolism. Theoretically, minute and unobservable changes to  
374 chemostat CO<sub>2</sub>+H<sub>2</sub> fermentation can disrupt the culture (Henry and Martin, 2016).  
375 Thus, increasing the free energy of central metabolism with CO-supplementation  
376 appears to keep metabolism in a spontaneous and stable state by increasing reduced  
377 ferredoxin production.

378 The mechanisms for achieving the 2-fold higher specific WLP flux throughput for  
379 CO/CO<sub>2</sub>/H<sub>2</sub><sup>1</sup> compared to others is less clear but appears to be linked to the difference  
380 in primary substrate. CO/CO<sub>2</sub>/H<sub>2</sub><sup>1</sup> and CO+H<sub>2</sub> are the most similar CO<sub>2</sub> and CO  
381 fermentations, respectively (D ~1 day<sup>-1</sup> and carbon to hydrogen feed ratio (~1:3); Table  
382 1), and the maximum carbon incorporation per cell for CO+H<sub>2</sub> was roughly half of that  
383 of CO/CO<sub>2</sub>/H<sub>2</sub><sup>1</sup> (~450 vs ~1000 mmol/gDCW). Theoretically, cells will maximize

## Enhancing CO<sub>2</sub>-valorization using *Clostridium autoethanogenum* for sustainable fuel and chemicals production

384 carbon-to-redox metabolism by minimizing thermodynamic losses. CO supplementation  
385 to a CO<sub>2</sub>+H<sub>2</sub> culture seems to facilitate this as  $(\text{H}_2/\text{carbon})_{\text{feed}} - (\text{H}_2/\text{carbon})_{\text{flux}}$  was ~0  
386 mol/mol for CO/CO<sub>2</sub>/H<sub>2</sub> fermentations only (Supplementary Files) – an indication of  
387 the relative magnitude of carbon and redox metabolism. This suggests that high specific  
388 fluxes for CO/CO<sub>2</sub>/H<sub>2</sub><sup>1</sup> may be a result of (close to) optimal co-factor recycling by *C.*  
389 *autoethanogenum*'s WLP and redox pathway. Thus, the lower energy associated with  
390 CO<sub>2</sub> fermentation may, counterintuitively, stimulate specific WLP activity when in the  
391 presence of appropriate energy-containing substrates. Further quantifications of CO<sub>2</sub>  
392 metabolism and characterizations of enzyme activities are required to confirm these  
393 hypotheses (Supplementary Files), as they assist our ability to engineer the links  
394 between redox and carbon metabolisms.

395 We established a dataset quantifying steady-state of the model acetogen *C.*  
396 *autoethanogenum* during autotrophic-CO<sub>2</sub>+H<sub>2</sub> growth in chemostat cultures. This  
397 enabled analysis *via* FBA, and highlighted CO as a potential supplement. CO  
398 supplementation successfully improved metabolic stability and CO<sub>2</sub> utilization. This  
399 was the first time that intracellular fluxes for net uptake of CO<sub>2</sub> (with enhancement)  
400 where characterized. Industry is actively developing gas fermentation to valorize CO<sub>2</sub>  
401 (Haas et al., 2018 & Tizard and Sechrist, 2015). Previously, genetic and process  
402 engineering of gas fermentation successfully developed the technology for industrial  
403 CO valorization (Liew et al., 2016). Therefore, progression to industrial CO<sub>2</sub>  
404 valorization is foreseeable, and CO supplementation may play a role in the continuing  
405 diversification of industrial gas fermentation.

### 406 **Conflict of Interest**

407 The authors declare that this study received funding from the Australian Research  
408 Council (ARC), partly funded by LanzaTech (ARC LP140100213). The ARC had no  
409 involvement with the study. LanzaTech has interest in commercializing gas  
410 fermentation with *C. autoethanogenum*. RT, SDS and MK are employees of LanzaTech.

### 411 **Author Contributions**

412 All authors viewed and approved the manuscript. All authors contributed significantly  
413 to the work. KV, EM, and LN conceived the project. JH, KV and EM designed the  
414 experiments and analysed the results. JH and KV performed experiments, supported by  
415 RL, IC, MP, and EM. JH wrote the manuscript with the help of KV, EM, RT, SS, MK,  
416 and LN.

### 417 **Funding**

418 This study was funded by a Grant from the Australian Research Council, partly funded  
419 by LanzaTech (ARC LP140100213).

### 420 **Acknowledgments**

421 Elements of this research utilized equipment and support provided by the Queensland  
422 node of Metabolomics Australia, an initiative of the Australian Government being  
423 conducted as part of the NCRIS National Research Infrastructure for Australia. IC

## Enhancing CO<sub>2</sub>-valorization using *Clostridium autoethanogenum* for sustainable fuel and chemicals production

424 would like to acknowledge support from the German Academic Exchange Service  
425 (DAAD) through the "DAAD Kurzustipendien für Doktoranden". We thank the  
426 following investors in LanzaTech's technology: Sir Stephen Tindall, Khosla Ventures,  
427 Qiming Venture Partners, Softbank China, the Malaysian Life Sciences Capital Fund,  
428 Mitsui, Primetals, CICC Growth Capital Fund I, L.P. and the New Zealand  
429 Superannuation Fund. There was no funding support from the European Union for the  
430 experimental part of the study. However, KV acknowledges support also from the  
431 European Union's Horizon 2020 research and innovation programme under grant  
432 agreement N810755.

### 433 Contribution to the field

434 Acetogenic bacteria comprise an ancient lineage and play a major role in global carbon  
435 cycle (accounting for at least 10<sup>13</sup> kg of acetate produced annually and 20% of the fixed  
436 carbon on earth). Due to their ability to grow autotrophically on carbonous waste-gas  
437 feedstocks, these organisms have gained significant interest in biotechnological  
438 applications. However, acetogens are considered living at the thermodynamic edge of  
439 life when growing autotrophically. Although they have evolved sophisticated strategies  
440 to conserve energy from reduction potential differences between major redox couples,  
441 this coupling is sensitive to small changes in thermodynamic equilibria. In the  
442 manuscript, we present experimental data showing CO<sub>2</sub> conversion to ethanol by an  
443 acetogenic bacteria used for industrial scale gas fermentation. Furthermore, we showed  
444 that supplementing CO enhances CO<sub>2</sub>+H<sub>2</sub> fermentation performance significantly.  
445 Analysis was only possible due to the first rigorously quantified dataset from  
446 continuous CO<sub>2</sub> and H<sub>2</sub> fermentation. This enabled discovery of notable insights into  
447 metabolic function – providing a potential guide for metabolic engineering. Therefore,  
448 here we outline that *Clostridium autoethanogenum* offers a promising route for the  
449 sustainable production of fuels and chemicals from a wide range of waste feedstocks –  
450 including CO<sub>2</sub>.

### 451 Supplementary Files

452 The Supplementary Files for this article can be found online.

### 453 References

- 454 Adamberg, K., Valgepea, K., and Vilu, R. (2015). Advanced continuous cultivation  
455 methods for systems microbiology. *Microbiol. (United Kingdom)* 161, 1707–1719.  
456 doi:10.1099/mic.0.000146.
- 457 Artz, J., Müller, T. E., Thenert, K., Kleinekorte, J., Meys, R., Sternberg, A., et al.  
458 (2018). Sustainable Conversion of Carbon Dioxide: An Integrated Review of  
459 Catalysis and Life Cycle Assessment. *Chem. Rev.* 118, 434–504.  
460 doi:10.1021/acs.chemrev.7b00435.
- 461 Bengelsdorf, F. R., Beck, M. H., Erz, C., Hoffmeister, S., Karl, M. M., Riegler, P., et al.  
462 (2018). Bacterial Anaerobic Synthesis Gas (Syngas) and CO<sub>2</sub> + H<sub>2</sub> Fermentation.  
463 *Adv. Appl. Microbiol.* doi:10.1016/bs.aambs.2018.01.002.

## Enhancing CO<sub>2</sub>-valorization using *Clostridium autoethanogenum* for sustainable fuel and chemicals production

- 464 Braun, K., and Gottschalk, G. (1981). Effect of molecular hydrogen and carbon dioxide  
465 on chemo-organotrophic growth of *Acetobacterium woodii* and *Clostridium*  
466 *aceticum*. *Arch. Microbiol.* 128, 294–298. doi:10.1007/BF00422533.
- 467 Charubin, K., and Papoutsakis, E. T. (2019). Direct cell-to-cell exchange of matter in a  
468 synthetic *Clostridium* syntrophy enables CO<sub>2</sub> fixation, superior metabolite yields,  
469 and an expanded metabolic space. *Metab. Eng.* 52, 9–19.  
470 doi:10.1016/j.ymben.2018.10.006.
- 471 Claassens, N. J., Sousa, D. Z., dos Santos, V. A. P. M., de Vos, W. M., and van der  
472 Oost, J. (2016). Harnessing the power of microbial autotrophy. *Nat. Rev.*  
473 *Microbiol.* 14, 692–706. doi:10.1038/nrmicro.2016.130.
- 474 Cueto-Rojas, H. F., van Maris, A. J. a. J. A., Wahl, S. A., and Heijnen, J. J. J. (2015).  
475 Thermodynamics-based design of microbial cell factories for anaerobic product  
476 formation. *Trends Biotechnol.* 33, 534–546. doi:10.1016/j.tibtech.2015.06.010.
- 477 Detz, R. J., Reek, J. N. H., and Van Der Zwaan, B. C. C. (2018). The future of solar  
478 fuels: When could they become competitive? *Energy Environ. Sci.* 11, 1653–1669.  
479 doi:10.1039/c8ee00111a.
- 480 Drake, H. L., Gößner, A. S., and Daniel, S. L. (2008). Old acetogens, new light. *Ann. N.*  
481 *Y. Acad. Sci.* 1125, 100–128. doi:10.1196/annals.1419.016.
- 482 Emerson, D. F., and Stephanopoulos, G. (2019). Limitations in converting waste gases  
483 to fuels and chemicals. *Curr. Opin. Biotechnol.* 59, 39–45.  
484 doi:https://doi.org/10.1016/j.copbio.2019.02.004.
- 485 Emerson, D. F., Woolston, B. M., Liu, N., Donnelly, M., Currie, D. H., and  
486 Stephanopoulos, G. (2019). Enhancing hydrogen-dependent growth of and carbon  
487 dioxide fixation by *Clostridium ljungdahli* through nitrate supplementation.  
488 *Biotechnol. Bioeng.* 116, 294–306. doi:10.1002/bit.26847.
- 489 Fast, A. G., and Papoutsakis, E. T. (2012). Stoichiometric and energetic analyses of  
490 non-photosynthetic CO<sub>2</sub>-fixation pathways to support synthetic biology strategies  
491 for production of fuels and chemicals. *Curr. Opin. Chem. Eng.* 1, 380–395.  
492 doi:10.1016/j.coche.2012.07.005.
- 493 Furdui, C., and Ragsdale, S. W. (2000). The role of pyruvate ferredoxin oxidoreductase  
494 in pyruvate synthesis during autotrophic growth by the Wood-Ljungdahl pathway.  
495 *J. Biol. Chem.* 275, 28494–28499. doi:10.1074/jbc.M003291200.
- 496 Glenk, G., and Reichelstein, S. (2019). Economics of converting renewable power to  
497 hydrogen. *Nat. Energy* 4. doi:10.1038/s41560-019-0326-1.
- 498 Götz, M., Lefebvre, J., Mörs, F., McDaniel Koch, A., Graf, F., Bajohr, S., et al. (2016).  
499 Renewable Power-to-Gas: A technological and economic review. *Renew. Energy*  
500 85, 1371–1390. doi:10.1016/j.renene.2015.07.066.
- 501 Groher, A., and Weuster-Botz, D. (2016). Comparative reaction engineering analysis of

## Enhancing CO<sub>2</sub>-valorization using *Clostridium autoethanogenum* for sustainable fuel and chemicals production

- 502 different acetogenic bacteria for gas fermentation. *J. Biotechnol.* 228, 82–94.  
503 doi:10.1016/j.jbiotec.2016.04.032.
- 504 Haas, T., Krause, R., Weber, R., Demler, M., and Schmid, G. (2018). Technical  
505 photosynthesis involving CO<sub>2</sub> electrolysis and fermentation. *Nat. Catal.* 1, 32–39.  
506 doi:10.1038/s41929-017-0005-1.
- 507 Handler, R. M., Shonnard, D. R., Griffing, E. M., Lai, A., and Palou-Rivera, I. (2016).  
508 Life Cycle Assessments of Ethanol Production via Gas Fermentation: Anticipated  
509 Greenhouse Gas Emissions for Cellulosic and Waste Gas Feedstocks. *Ind. Eng.*  
510 *Chem. Res.* 55, 3253–3261. doi:10.1021/acs.iecr.5b03215.
- 511 Henry, A., and Martin, O. C. (2016). Short relaxation times but long transient times in  
512 both simple and complex reaction networks. *J. R. Soc. Interface.*  
513 doi:<https://doi.org/10.1098/rsif.2016.0388>.
- 514 Hess, V., Schuchmann, K., and Müller, V. (2013). The ferredoxin: NAD<sup>+</sup>  
515 Oxidoreductase (Rnf) from the acetogen acetobacterium woodii requires na<sup>+</sup> and is  
516 reversibly coupled to the membrane potential. *J. Biol. Chem.* 288, 31496–31502.  
517 doi:10.1074/jbc.M113.510255.
- 518 Hoffmeister, S., Gerdom, M., Bengelsdorf, F. R., Linder, S., Flüchter, S., Öztürk, H., et  
519 al. (2016). Acetone production with metabolically engineered strains of  
520 *Acetobacterium woodii*. *Metab. Eng.* 36, 37–47. doi:10.1016/j.ymben.2016.03.001.
- 521 Hoskisson, P. A., and Hobbs, G. (2005). Continuous culture - Making a comeback?  
522 *Microbiology* 151, 3153–3159. doi:10.1099/mic.0.27924-0.
- 523 Hu, P., Chakraborty, S., Kumar, A., Woolston, B. M., Liu, H., Emerson, D., et al.  
524 (2016). Integrated Bioprocess for Conversion of Gaseous Substrates to Liquids.  
525 *Proc. Natl. Acad. Sci.* 113, 2–7. doi:10.1073/pnas.1516867113.
- 526 Igamberdiev, A. U., and Kleczkowski, L. A. (2009). Metabolic systems maintain stable  
527 non-equilibrium via thermodynamic buffering. *BioEssays* 31, 1091–1099.  
528 doi:10.1002/bies.200900057.
- 529 Infantes, A., Kugel, M., and Neumann, A. (2020). Effect of Cysteine , Yeast Extract ,  
530 pH Regulation and Gas Flow on Acetate and Ethanol Formation and Growth  
531 Profiles of *Clostridium ljungdahlii* Syngas Fermentation. *bioRxiv [preprint]*.  
532 doi:<http://dx.doi.org/10.1101/2020.01.13.904292>.
- 533 International Panel on Climate Change (IPCC) (2014). *Climate Change 2014:*  
534 *Mitigation of Climate Change*. doi:10.1017/CBO9781107415416.
- 535 IRENA (2017). Renewable Power Generation Costs in 2017.  
536 doi:10.1007/SpringerReference\_7300.
- 537 Jones, S. W., Fast, A. G., Carlson, E. D., Wiedel, C. A., Au, J., Antoniewicz, M. R., et  
538 al. (2016). CO<sub>2</sub> fixation by anaerobic non-photosynthetic mixotrophy for  
539 improved carbon conversion. *Nat. Commun.* 7, 1–9. doi:10.1038/ncomms12800.

## Enhancing CO<sub>2</sub>-valorization using *Clostridium autoethanogenum* for sustainable fuel and chemicals production

- 540 Kantzow, C., Mayer, A., and Weuster-Botz, D. (2015). Continuous gas fermentation by  
541 *Acetobacterium woodii* in a submerged membrane reactor with full cell retention.  
542 *J. Biotechnol.* 212, 11–18. doi:10.1016/j.jbiotec.2015.07.020.
- 543 Keith, D. W., Holmes, G., St. Angelo, D., and Heidel, K. (2018). A Process for  
544 Capturing CO<sub>2</sub> from the Atmosphere. *Joule* 2, 1573–1594.  
545 doi:10.1016/J.JOULE.2018.05.006.
- 546 Klask, C., Kliem-kuster, N., Molitor, B., and Angenent, L. T. (2019). An open-source  
547 multiple-bioreactor system for replicable gas- fermentation experiments : Nitrate  
548 feed results in stochastic inhibition events , but improves ethanol production of  
549 *Clostridium ljungdahlii* with CO<sub>2</sub> and H<sub>2</sub>. *bioRxiv [preprint]*.  
550 doi:<https://doi.org/10.1101/2019.12.15.877050>.
- 551 Liew, F. M., Martin, E., Tappel, R., Heijstra, B., Mihalcea, C., and Köpke, M. (2016).  
552 Gas Fermentation – A Flexible Platform for Commercial Scale Production of Low  
553 Carbon Fuels and Chemicals from Waste and Renewable Feedstocks. *Front.*  
554 *Microbiol.* 7, 694. doi:10.3389/fmicb.2016.00694.
- 555 Ma, Y., Yu, G., and Li, H. Z. (2005). Note on the mechanism of interfacial mass  
556 transfer of absorption processes. *Int. J. Heat Mass Transf.* 48, 3454–3460.  
557 doi:10.1016/j.ijheatmasstransfer.2005.03.008.
- 558 Mock, J., Zheng, Y., Mueller, A. P., Ly, S., Tran, L., Segovia, S., et al. (2015). Energy  
559 conservation associated with ethanol formation from H<sub>2</sub> and CO<sub>2</sub> in *Clostridium*  
560 *autoethanogenum* involving electron bifurcation. *J. Bacteriol.*  
561 doi:10.1128/JB.00399-15.
- 562 Molitor, B., Mishra, A., and Angenent, L. T. (2019). Power-to-protein: converting  
563 renewable electric power and carbon dioxide into single cell protein with a two-  
564 stage bioprocess. *Energy Environ. Sci.* doi:10.1039/C9EE02381J.
- 565 Morinaga, T., and Kawada, N. (1990). The production of acetic acid from carbon  
566 dioxide and hydrogen by an anaerobic bacterium. *J. Biotechnol.* 14, 187–194.  
567 doi:10.1007/BF02146190.
- 568 Müller, V. (2019). New Horizons in Acetogenic Conversion of One-Carbon Substrates  
569 and Biological Hydrogen Storage. *Trends Biotechnol.* 37, 1344–1354.  
570 doi:10.1016/j.tibtech.2019.05.008.
- 571 Orth, J. D., and Palsson, B. Ø. (2011). What is flux balance analysis? *Nat. Biotechnol.*  
572 28, 245–248. doi:10.1038/nbt.1614.What.
- 573 Otto, A., Grube, T., Schiebahn, S., and Stolten, D. (2015). Closing the loop: Captured  
574 CO<sub>2</sub> as a feedstock in the chemical industry. *Energy Environ. Sci.* 8, 3283–3297.  
575 doi:10.1039/c5ee02591e.
- 576 Park, J. O., Liu, N., Holinski, K. M., Emerson, D. F., Qiao, K., Woolston, B. M., et al.  
577 (2019). Synergistic substrate cofeeding stimulates reductive metabolism. *Nat.*  
578 *Metab.* 1, 643–651. doi:10.1038/s42255-019-0077-0.

## Enhancing CO<sub>2</sub>-valorization using *Clostridium autoethanogenum* for sustainable fuel and chemicals production

- 579 Pierce, E., Xie, G., Barabote, R. D., Saunders, E., Han, C. S., Detter, J. C., et al. (2008).  
580 The complete genome sequence of *Moorella thermoacetica* (f. *Clostridium*  
581 *thermoacetum*). *Environ. Microbiol.* 10, 2550–2573. doi:10.1111/j.1462-  
582 2920.2008.01679.x.
- 583 Poehlein, A., Cebulla, M., Ilg, M. M., Bengelsdorf, F. R., Schiel-bengelsdorf, B.,  
584 Whited, G., et al. (2015). The Complete Genome Sequence of *Clostridium*  
585 *aceticum*: a Missing Link between Rnf- and Cytochrome-Containing Autotrophic  
586 Acetogens. *MBio* 6, e01168-15. doi:10.1128/mBio.01168-15.Editor.
- 587 Qian, H., and Beard, D. A. (2005). Thermodynamics of stoichiometric biochemical  
588 networks in living systems far from equilibrium. *Biophys. Chem.* 114, 213–220.  
589 doi:<https://doi.org/10.1016/j.bpc.2004.12.001>.
- 590 Quémener, E. D. Le, and Bouchez, T. (2014). A thermodynamic theory of microbial  
591 growth. *ISME J.* 8, 1747–1751. doi:10.1038/ismej.2014.7.
- 592 Redl, S., Diender, M., Jensen, T. Ø., Sousa, D. Z., and Nielsen, A. T. (2017). Exploiting  
593 the potential of gas fermentation. *Ind. Crops Prod.*  
594 doi:10.1016/j.indcrop.2016.11.015.
- 595 Richter, H., Molitor, B., Wei, H., Chen, W., Aristilde, L., and Angenent, L. T. (2016).  
596 Ethanol production in syngas-fermenting *Clostridium ljungdahlii* is controlled by  
597 thermodynamics rather than by enzyme expression. *Energy Environ. Sci.*  
598 doi:10.1039/C6EE01108J.
- 599 Sakai, S., Nakashimada, Y., Inokuma, K., Kita, M., Okada, H., and Nishio, N. (2005).  
600 Acetate and ethanol production from H<sub>2</sub> and CO<sub>2</sub> by *Moorella* sp. using a repeated  
601 batch culture. *J. Biosci. Bioeng.* 99, 252–8. doi:10.1263/jbb.99.252.
- 602 Sandoval-Espinola, W. J., Chinn, M. S., Thon, M. R., and Bruno-Bárcena, J. M. (2017).  
603 Evidence of mixotrophic carbon-capture by n-butanol-producer *Clostridium*  
604 *beijerinckii*. *Sci. Rep.* 7, 1–13. doi:10.1038/s41598-017-12962-8.
- 605 Schuchmann, K., and Müller, V. (2014). Autotrophy at the thermodynamic limit of life:  
606 a model for energy conservation in acetogenic bacteria. *Nat. Rev. Microbiol.* 12,  
607 809–821. doi:10.1038/nrmicro3365.
- 608 Standing, C. N., Fredrickson, A. G., and Tsuchiya, H. M. (1972). Batch- and  
609 continuous-culture transients for two substrate systems. *Appl. Microbiol.* 23, 354–  
610 359.
- 611 Tizard, J. H., and Sechrist, P. A. (2015). Carbon Capture in Fermentation. U.S. Patent  
612 No 0,111,266. Washington, DC: U.S. Patent and Trademark Office. Available at:  
613 <https://patents.justia.com/patent/20150111266>.
- 614 Valgepea, K., De Souza Pinto Lemgruber, R., Abdalla, T., Binos, S., Takemori, N.,  
615 Takemori, A., et al. (2018). H<sub>2</sub> drives metabolic rearrangements in gas-fermenting  
616 *Clostridium autoethanogenum*. *Biotechnol. Biofuels* 11, 55. doi:10.1186/s13068-  
617 018-1052-9.

## Enhancing CO<sub>2</sub>-valorization using *Clostridium autoethanogenum* for sustainable fuel and chemicals production

618 Valgepea, K., de Souza Pinto Lemgruber, R., Meaghan, K., Palfreyman, R. W.,  
619 Abdalla, T., Heijstra, B. D., et al. (2017). Maintenance of ATP Homeostasis  
620 Triggers Metabolic Shifts in Gas-Fermenting Acetogens. *Cell Syst.* 4.

### 621 **Figure captions**

622 **Figure 1.** Important fermentation characteristics of *Clostridium autoethanogenum* in  
623 autotrophic chemostats. Results from Valgepea et al. (2018) are also displayed (**B, C &**  
624 **D**), the conditions of all fermentations are summarized in Table 1. Growth curves of  
625 novel fermentations with standard deviation at steady-state (**A**). Specific rates of uptake  
626 (**B**) and production (**C**) for important metabolites. Product carbon balances (**D**). Values  
627 represent the average  $\pm$  standard deviation between biological replicates. Number of  
628 biological replicates, and detailed gas composition for each fermentation are available in  
629 Table 1. Patterned bars indicate a D of 1 day<sup>-1</sup>, full bars indicate a D of 0.5 day<sup>-1</sup> (**B, C**  
630 **& D**). Abbreviations:  $q$  –specific rate,  $DCW$  – dry cell weight.

631 **Figure 2.** Predictions of central metabolic pathway fluxes for autotrophic fermentations  
632 of *Clostridium autoethanogenum* using iCLAU786, flux balance analysis, and  
633 chemostat data. Results from Valgepea et al. (2018) are also displayed, the conditions of  
634 these fermentations are summarized in Table 1. Fluxes (mmol/gDCW/h) are represented  
635 as the average  $\pm$  standard deviation between biological replicates. Number of biological  
636 replicates, and detailed gas composition for each fermentation are available in Table 1.  
637 Arrows show the direction of calculated fluxes; red arrows denote uptake or secretion,  
638 dashed arrows denote a series of reactions. Brackets denote metabolites bound by an  
639 enzyme. Refer to Supplementary Files for enzyme involvement, metabolite  
640 abbreviations, and complete flux balance analysis datasets.

641



## Enhancing CO<sub>2</sub>-valorization using *Clostridium autoethanogenum* for sustainable fuel and chemicals production

### 642 Tables and Figures

643 **Table 1.** Summary of low-biomass *Clostridium autoethanogenum* fermentations.

644

| Gas                                | y<br>(Ar to 100%)                                       | F<br>mL/min | N<br>rpm | BR<br># | D<br>day <sup>-1</sup> | BC<br>gDCW/L | Ace  |      | EtOH |      |      |
|------------------------------------|---------------------------------------------------------|-------------|----------|---------|------------------------|--------------|------|------|------|------|------|
|                                    |                                                         |             |          |         |                        |              | ±    | g/L  | ±    | g/L  |      |
| CO                                 | 60% CO                                                  | 50          | 510      | 4       | 1                      | 0.47         | 0.02 | 2.12 | 0.18 | 0.63 | 0.05 |
| Syngas                             | 50 % CO,<br>20% CO <sub>2</sub> ,<br>20% H <sub>2</sub> | 50          | 500      | 2       | 1                      | 0.48         | 0.04 | 4.35 | 0.12 | 0.61 | 0.06 |
| CO+H <sub>2</sub>                  | 15% CO,<br>45% H <sub>2</sub>                           | 50          | 650      | 4       | 1                      | 0.46         | 0.04 | 0.69 | 0.07 | 4.46 | 0.41 |
| CO/CO <sub>2</sub> /H <sub>2</sub> | 2% CO,<br>23% CO <sub>2</sub> ,<br>65% H <sub>2</sub>   | 30          | 1200     | 2       | 1                      | 0.34         | 0.02 | 5.03 | 0.34 | 4.79 | 0.43 |
| CO <sub>2</sub> +H <sub>2</sub>    | 23% CO <sub>2</sub> ,<br>67% H <sub>2</sub>             | 32          | 500      | 3       | 0.5                    | 0.18         | 0.02 | 2.51 | 0.42 | 2.36 | 0.25 |
| CO/CO <sub>2</sub> /H <sub>2</sub> | 2% CO,<br>23% CO <sub>2</sub> ,<br>65% H <sub>2</sub>   | 30          | 800      | 2       | 0.5                    | 0.54         | 0.01 | 5.97 | 0.98 | 9.69 | 0.39 |

645

646 The horizontal line through the middle of the table indicates where the data is from;  
647 above the line is data from (Valgepea et al., 2018), and below the line is novel data.

648 Abbreviations: y – gas compositions, F – gas flowrate, N – stirrer speed, BR –  
649 biological replicates, D – dilution rate, BC – biomass concentration, Ace – acetate  
650 concentration, EtOH – ethanol concentration, ± - plus/minus standard deviation.

651

## Enhancing CO<sub>2</sub>-valorization using *Clostridium autoethanogenum* for sustainable fuel and chemicals production

652 **Table 2.** Summary of quantitative and continuous CO<sub>2</sub>+H<sub>2</sub> fermentations.

653

| Organism                           | Strain                                   | Experimental Conditions                                                                                                                                                              | Growth rate (day <sup>-1</sup> ) | C <sub>Product</sub> g[DCW]/L                                                                      | Productivity g/L/day, (g/gDCW/day)          | Ref.             |
|------------------------------------|------------------------------------------|--------------------------------------------------------------------------------------------------------------------------------------------------------------------------------------|----------------------------------|----------------------------------------------------------------------------------------------------|---------------------------------------------|------------------|
| <i>Acetobacterium woodii</i>       | DSM 1030                                 | 1 L chemostat, D = 0.84 day <sup>-1</sup> , 1200 rpm, 30 L/h 17% CO <sub>2</sub> , 40% H <sub>2</sub> , 43% N <sub>2</sub> , 1 atm, pH 7.0, 30 °C, 4 g/L YE, n = 1                   | μ = 0.84                         | B = 1.1<br>A = 22.0                                                                                | A = 19.1 (17.4)                             | 1                |
|                                    |                                          | 1 L batch retentostat, D = 1.68 day <sup>-1</sup> , 1200 rpm, 30 L/h 17% CO <sub>2</sub> , 40% H <sub>2</sub> , 43% N <sub>2</sub> , 1 atm, pH 7.0, 30 °C, 4 g/L YE, n = 1           |                                  | B = 6.0 <sup>a,b</sup><br>A = 22.6                                                                 | A = 40 (16.0 <sup>a,b</sup> )               | 1                |
|                                    |                                          | D = 4.2 day <sup>-1</sup>                                                                                                                                                            |                                  | B = 10.0 <sup>a,b</sup><br>A = 23.5                                                                | A = 95 (18.5 <sup>a,b</sup> )               |                  |
|                                    |                                          | 1 L batch retentostat, D = 8.4 day <sup>-1</sup> , 1200 rpm, 30 L/h 25% CO <sub>2</sub> , 60% H <sub>2</sub> , 15% N <sub>2</sub> , 1 atm, pH 7.0, 30 °C, 4 g/L YE, n = 1            |                                  | B = 11.0<br>A = 17.6                                                                               | A = 148 (20.3)                              | 1 <sup>b,c</sup> |
|                                    | pMTL84151 <sub>-act<sub>thIA</sub></sub> | 0.85 L batch retentostat, D = 1 day <sup>-1</sup> , 800 rpm, 30 L/h 20% CO <sub>2</sub> & 80% H <sub>2</sub> , pH 7.0, 30 °C, 2 g/L YE, 10 g/L K-acetate, n = 1                      | μ = 0                            | B = 4.6 <sup>d</sup><br>A = 48.6<br>Ac = 3.0                                                       | Ac = 0.6 (0.1)                              | 2                |
| <i>Acetobacterium</i> sp.          | BR446                                    | Semi-batch retentostat, D = 24 day <sup>-1</sup> , CO <sub>2</sub> & H <sub>2</sub> , medium not specified                                                                           |                                  | B = 4.8<br>A = 3.0                                                                                 | A = 71.0 (14.7)                             | 3                |
| <i>Clostridium autoethanogenum</i> | DSM 19630                                | 0.75 L chemostat, D = 0.5 day <sup>-1</sup> , 500 rpm, 1.92 L/h 23% CO <sub>2</sub> , 67% H <sub>2</sub> , 10% Ar, 1 atm, pH 5, 37 °C, DM, n = 3                                     | μ = 0.5                          | B = 0.2<br>A = 2.5<br>E = 2.4                                                                      | B = 0.1<br>A = 1.3 (6.8)<br>E = 1.2 (6.4)   |                  |
|                                    |                                          | 800 rpm, 1.8 L/h 2% CO, 23% CO <sub>2</sub> , 67% H <sub>2</sub> , 10% Ar, n = 2                                                                                                     | μ = 0.5                          | B = 0.5<br>A = 6.0<br>E = 9.7                                                                      | B = 0.3<br>A = 3.0 (5.5)<br>E = 6.3 (11.6)  | Here             |
|                                    |                                          | D = 1 day <sup>-1</sup> , 1200 rpm                                                                                                                                                   | μ = 1.0                          | B = 0.3<br>A = 5.0<br>E = 4.8                                                                      | B = 0.3<br>A = 5.0 (14.6)<br>E = 6.2 (18.1) |                  |
|                                    | DSM 10061                                | 1.3 L continuous retentostat, D = 4.9 day <sup>-1</sup> , 21 L/h 23% CO <sub>2</sub> , 65% H <sub>2</sub> , 9.2% N <sub>2</sub> , pH 5.3, 37 °C, DM, 3.1 g/L ammonium acetate, n = 1 | μ = 0.5                          | B = 1.8<br>A = 7.5<br>E = 6.3                                                                      | A = 36.7 (20.0)<br>E = 30.9 (16.9)          | 4                |
| <i>Clostridium ljungdahlii</i>     | DSM 13528                                | 0.5 L chemostat, D = 0.29 day <sup>-1</sup> , 300 rpm, 1.8 L/h 20% CO <sub>2</sub> & 80% H <sub>2</sub> , pH 5.5, 37 °C, DM, n = 3                                                   | μ = 0.29                         | B = 0.2 <sup>e</sup><br>A = 6.3<br>E = 1.8                                                         | A = 1.8<br>E = 0.5                          |                  |
|                                    |                                          | DM with NaNO <sub>3</sub> replacing NH <sub>4</sub> Cl, n = 1                                                                                                                        | μ = 0.29                         | B = 0.3 <sup>b,e</sup> (pH 5.5)<br>A = 13.4 <sup>b</sup> (pH 6.0)<br>E = 5.0 <sup>b</sup> (pH 5.0) | A = 3.9<br>E = 1.4                          | 5                |
|                                    |                                          | 1 L batch retentostat, D = 0.96 day <sup>-1</sup> , 300 rpm, 7.2 L/h 20% CO <sub>2</sub> & 80% H <sub>2</sub> , pH 5.7, 35 °C, DM, n = 1                                             | μ = 0                            | B = 2.3 <sup>a</sup><br>A = 18.5                                                                   | A = 17.7                                    | 6                |
| <i>Moorella thermoacetica</i>      | ATCC 49707                               | 1 L BCR, D = 2.16 day <sup>-1</sup> , 72 L/h 33% CO <sub>2</sub> & 67% H <sub>2</sub> , pH = 6.0, 60 °C, 10 g/L YE, n = 1                                                            | μ = 0                            | B = 4.1 <sup>a</sup><br>A = 25.0 <sup>a</sup>                                                      | A = 54.0 (13.3) <sup>f</sup>                | 7                |
| <i>Moorella</i> sp.                | HUC22-1                                  | 0.5 L semi-continuous with cell retention, 500 rpm, continuous 20% CO <sub>2</sub> & 80% H <sub>2</sub> , 3.6 L/h, pH 6.2, 55 °C, 1 g/L YE, n = 1                                    | μ = 0                            | B = 1.5<br>A = 22.0<br>E = 0.3                                                                     | A = 6.9 (10.4)                              | 8                |

654

## Enhancing CO<sub>2</sub>-valorization using *Clostridium autoethanogenum* for sustainable fuel and chemicals production

655 Thick borders separate organisms, while thin borders separate similar experiments –  
656 for which only differences in conditions are stated following the first experiment.  
657 Bolded experiments are chemostats. Only biomass concentration is given in gDCW/L.

658 Ref. 1 – 8: Kantzow et al., 2015; Hoffmeister et al., 2016; Morinaga and Kawada, 1990;  
659 Mock et al., 2015; (preprint) Klask et al., 2019; Molitor et al., 2019; Hu et al., 2016;  
660 Sakai et al., 2005.

661 Abbreviations:  $c_{\text{Product}}$  – product concentration, D - dilution rate, YE – yeast extract, DM  
662 – defined medium, n – number of replicates, B – biomass, A – acetate, E – ethanol, Ac –  
663 acetone, BCR – bubble column reactor.

664 Notes: <sup>a</sup> estimated from graph, <sup>b</sup> not steady state (represented as maximum), <sup>c</sup> cell  
665 retention membrane was blocked before steady state was reached, <sup>d</sup> calculated using  
666 data from Kantzow et al. (2015), <sup>e</sup> calculated using data from Molitor et al. (2019), <sup>f</sup>  
667 calculated using estimated data.

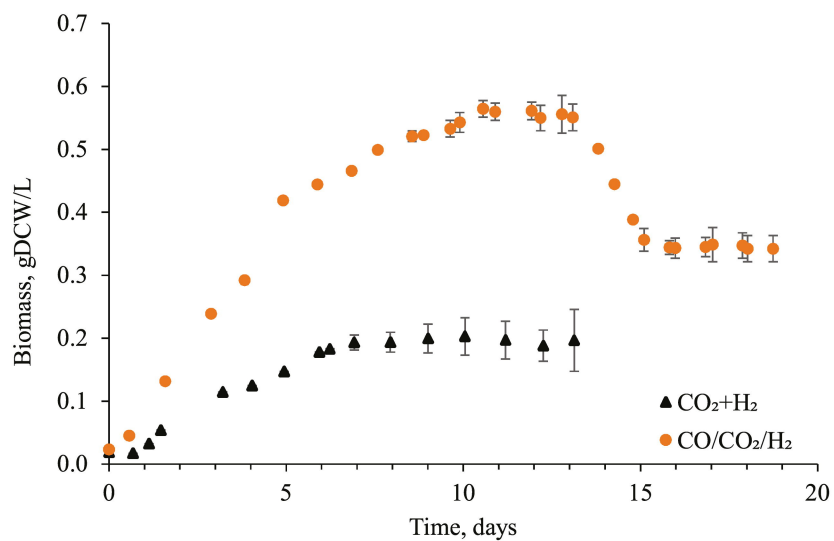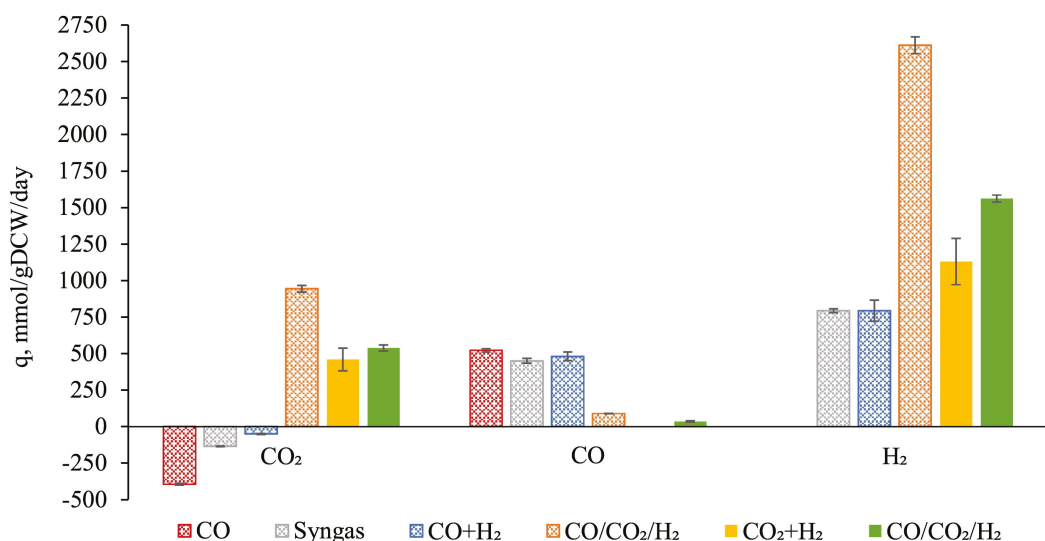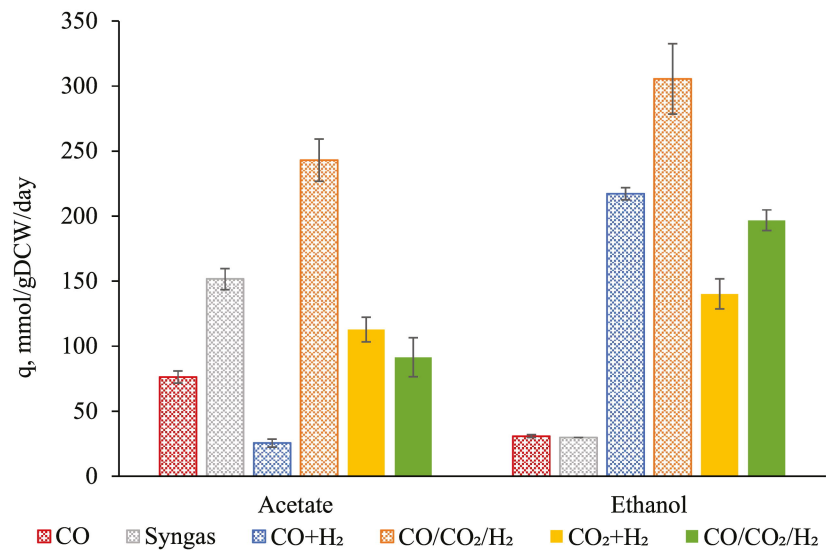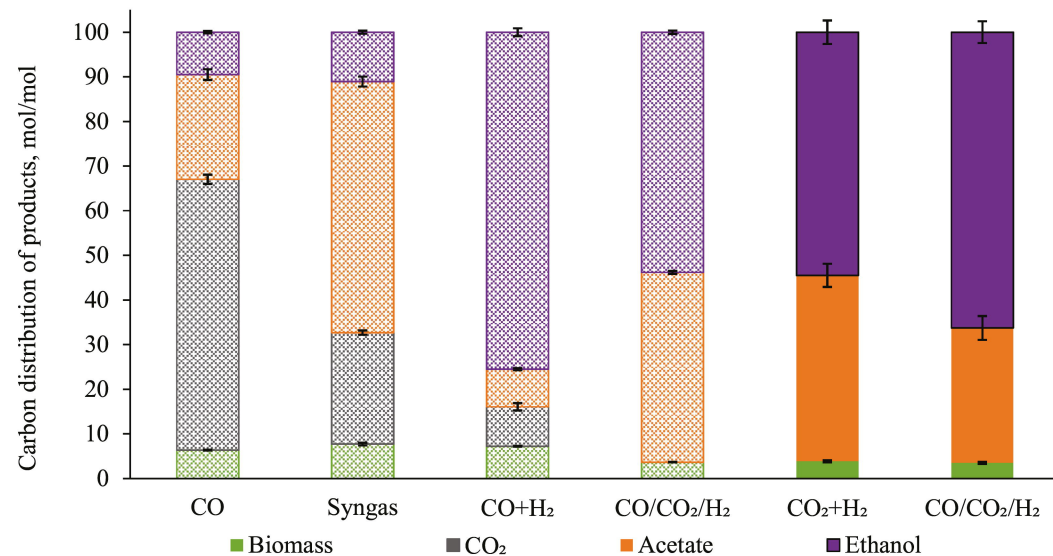

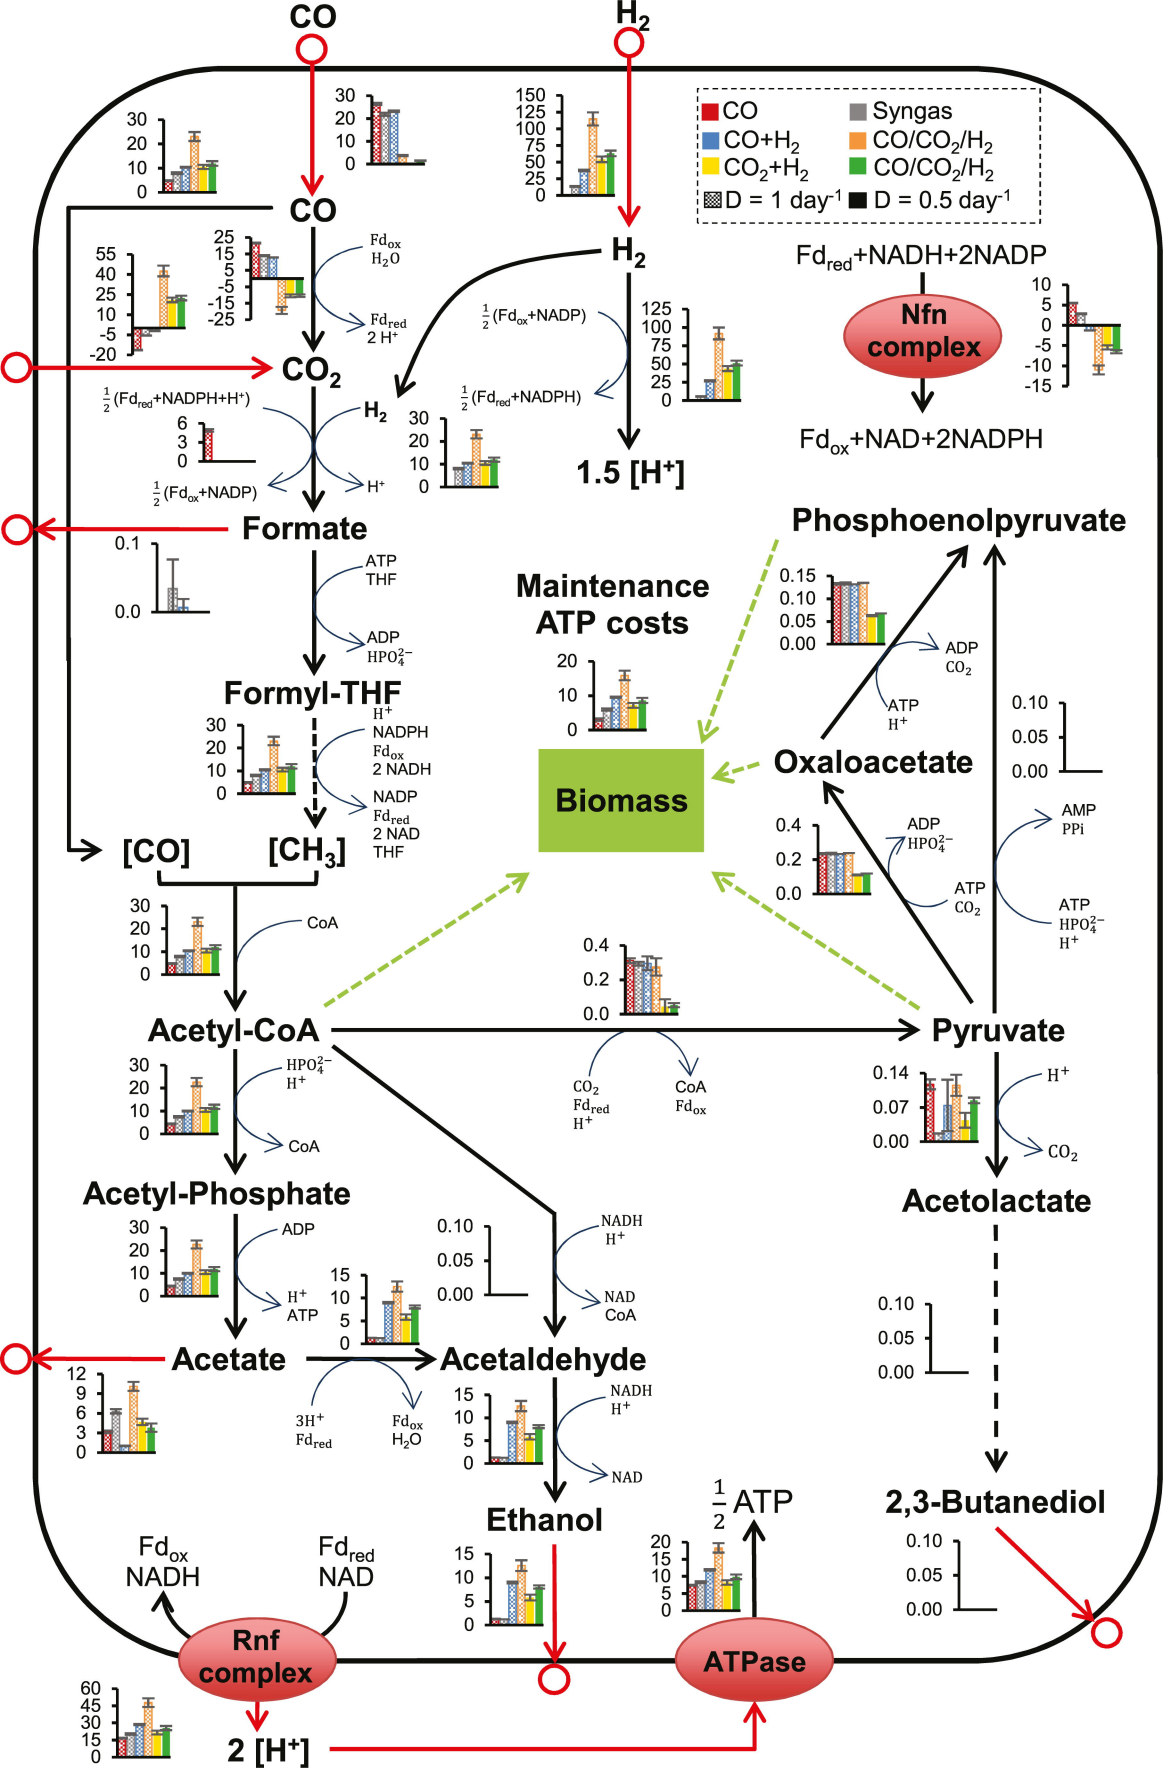

Source: https://www.biorxiv.org/content/10.1101/2020.01.23.917666v1.full.pdf
