# Enhancing CO<sub>2</sub>-valorization using *Clostridium autoethanogenum* for sustainable fuel and chemicals production

James K. Heffernan<sup>1&</sup>, Kaspar Valgepea<sup>1,2&</sup>, Renato de Souza Pinto Lemgruber<sup>1</sup>,  
Isabella Casini<sup>3</sup>, Manuel Plan<sup>4</sup>, Ryan Tappel<sup>5</sup>, Sean D. Simpson<sup>5</sup>, Michael Köpke<sup>5</sup>,  
Lars K. Nielsen<sup>1,4</sup>, Esteban Marcellin<sup>1,4\*</sup>

<sup>1</sup>Australian Institute for Bioengineering and Nanotechnology, The University of  
Queensland, Building 75, Corner College Rd & Cooper Rd, St. Lucia 4067, QLD,  
Australia.

<sup>2</sup>ERA Chair in Gas Fermentation Technologies, Institute of Technology, University of  
Tartu, Nooruse 1, 50411 Tartu, Estonia.

<sup>3</sup>Center for Applied Geosciences, University of Tübingen, Hölderlinstr. 12, 72074,  
Tübingen, Germany.

<sup>4</sup>Queensland Node of Metabolomics Australia, The University of Queensland, Building  
75, Corner College Rd & Cooper Rd, St. Lucia 4067, QLD, Australia.

<sup>5</sup>LanzaTech Inc., 8045 Lamon Ave Suite 400, Skokie, IL 60077, USA.

**\* Correspondence:**  
Corresponding author  
[e.marcellin@uq.edu.au](mailto:e.marcellin@uq.edu.au)

**& Equal contributors**

**Keywords:** gas fermentation, *Clostridium autoethanogenum*, carbon dioxide,  
valorization, carbon recycling, fuel and chemical platforms.

## Abstract

Acetogenic bacteria can convert waste gases into fuels and chemicals. Design of  
bioprocesses for waste carbon valorization requires quantification of steady-state carbon  
flows. Here, steady-state quantification of autotrophic chemostats containing  
*Clostridium autoethanogenum* grown on CO<sub>2</sub> and H<sub>2</sub> revealed that captured carbon (460  
± 80 mmol/gDCW/day) had a significant distribution to ethanol (54 ± 3 mol% with a  
2.4 ± 0.3 g/L titer). We were impressed with this initial result, but also observed  
limitations to biomass concentration and growth rate. Metabolic modelling predicted  
culture performance and indicated significant metabolic adjustments when compared to  
fermentation with CO as the carbon source. Moreover, modelling highlighted flux to  
pyruvate, and subsequently reduced ferredoxin, as a target for improving CO<sub>2</sub> and H<sub>2</sub>  
fermentation. Supplementation with a small amount of CO enabled co-utilisation with  
CO<sub>2</sub>, and enhanced CO<sub>2</sub> fermentation performance significantly, while maintaining an  
industrially relevant product profile. Additionally, the highest specific flux through the  
Wood-Ljungdahl pathway was observed during co-utilization of CO<sub>2</sub> and CO.

## Enhancing CO<sub>2</sub>-valorization using *Clostridium autoethanogenum* for sustainable fuel and chemicals production

Furthermore, the addition of CO led to superior CO<sub>2</sub>-valorizing characteristics ( $9.7 \pm 0.4$  g/L ethanol with a  $66 \pm 2$  mol% distribution, and  $540 \pm 20$  mmol CO<sub>2</sub>/gDCW/day). Similar industrial processes are commercial or currently being scaled up, indicating CO-supplemented CO<sub>2</sub> and H<sub>2</sub> fermentation has high potential for sustainable fuel and chemical production. This work also provides a reference dataset to advance our understanding of CO<sub>2</sub> gas fermentation, which can contribute to mitigating climate change.

### Introduction

Gas fermentation has attractive waste carbon valorization properties, for which the need is intensifying (Emerson and Stephanopoulos, 2019; IPCC, 2014). Recently, LanzaTech commercialized the first waste gas-to-ethanol process, efficiently incorporating the carbon from steel mill off-gas into fuel quality ethanol *via* the model acetogen *Clostridium autoethanogenum*. The key carbon source — carbon monoxide (CO) — accounts for a significant portion of steel mill off-gas and synthesis gas (syngas), which can be generated from multiple high-volume, non-gaseous waste feedstocks (e.g. biomass, municipal solid waste) (Liew et al., 2016). Therefore, LanzaTech's process is significant in that it valorizes waste carbon by fusing two one-carbon gas molecules (C1) into liquid fuel. Furthermore, Handler et al. (2016) found that ethanol produced by LanzaTech's process reduced greenhouse gas emissions by 67 to 98% when compared to petroleum gasoline on an energy content and "cradle-to-grave" basis (feedstock dependent). Carbon dioxide (CO<sub>2</sub>) represents a more diverse and plentiful waste stream compared to CO (International Panel on Climate Change (IPCC), 2014), thus embodying a feedstock with greater climate change mitigation and carbon recycling potential.

Increasing acetogenic carbon capture as CO<sub>2</sub> would build on the success of commercial gas fermentation and continue the expansion of the technology as a platform for sustainable chemical production (Bengelsdorf et al., 2018; Müller, 2019; Redl et al., 2017). Compared to other CO<sub>2</sub> valorization methods, acetogens are ideal candidates due to their high metabolic efficiency, ability to handle variable gas compositions, high product specificity, scalability, and low susceptibility to poisoning by sulphur, chlorine, and tars (Artz et al., 2018; Liew et al., 2016). However, metabolism of CO<sub>2</sub> requires an energy source, for which some see an appropriate solution is lacking (Emerson and Stephanopoulos, 2019).

Gas fermenting acetogens harbor the Wood-Ljungdahl pathway (WLP) (Drake et al., 2008), a non-photosynthetic C1-fixation metabolic pathway with the highest-known theoretical thermodynamic efficiency (Fast and Papoutsakis, 2012; Müller, 2019; Schuchmann and Müller, 2014). Various potential energy sources exist for metabolizing CO<sub>2</sub>, primarily hydrogen, nitrates, sugars, and arginine. Yet, acetogenic CO<sub>2</sub> valorization, which is actively being developed for industrial implementation (Tizard and Sechrist, 2015), poses challenges along with promise. These include potential adenosine triphosphate (ATP) starvation in autotrophic conditions and carbon catabolite repression in hetero/mixotrophic conditions (Emerson and Stephanopoulos, 2019).

Hydrogen (H<sub>2</sub>) is the most recognized energy source for CO<sub>2</sub> utilization — as metabolism of sugars or nitrates cause shifts in metabolism that result in lower CO<sub>2</sub> or

## Enhancing CO<sub>2</sub>-valorization using *Clostridium autoethanogenum* for sustainable fuel and chemicals production

H<sub>2</sub> utilization (Emerson and Stephanopoulos, 2019 & Liew et al., 2016). H<sub>2</sub> production will also logically transition to renewable sources in the future, whereas production of sugars and nitrates are dependent on less-sustainable methods. Furthermore, leveled cost predictions for solar H<sub>2</sub> indicate a 30% reduction by 2030, potentially becoming competitive with the current leveled cost of fossil fuel derived H<sub>2</sub> by 2035 (Detz et al., 2018; Glenk and Reichelstein, 2019). This is in part due to rapidly decreasing solar electricity costs (IRENA, 2017) and projections of H<sub>2</sub> electrolysis technology development (Detz et al., 2018; Glenk and Reichelstein, 2019). Similarly, atmospheric CO<sub>2</sub> capture *via* direct air contact showed promising feasibility recently (Keith et al., 2018), which represents an essential development for carbon recycling (Otto et al., 2015). Various power-to-gas technologies are being discussed for mediating fluctuations in renewable power generation (Götz et al., 2016). By extension, gas fermentation to liquid products could couple mediation of renewable power fluctuations to carbon recycling (Redl et al., 2017). This provides an attractive new opportunity for bacterial artificial-photosynthesis, whereby renewable H<sub>2</sub> supplementation facilitates acetogenic CO<sub>2</sub> valorization (Claassens et al., 2016; Haas et al., 2018).

Continuous culture bioprocesses are preferable to batch or fed-batch fermentation bioprocesses (Hoskisson and Hobbs, 2005). Furthermore, systems-level quantification is essential for design-build-test-learn bioprocess optimization by metabolic engineering (Valgepea et al., 2017). Therefore, obtaining quantitative datasets from steady-state chemostat cultures, whose analyses are comparable between experiments, is important for development of these systems (Adamberg et al., 2015). Whilst Bengelsdorf et al. (2018) reviewed autotrophic acetogen growth on CO<sub>2</sub> and H<sub>2</sub> (CO<sub>2</sub>+H<sub>2</sub>), and Mock et al. (2015) provided notable insight into the CO<sub>2</sub>+H<sub>2</sub> metabolism of *C. autoethanogenum*, the literature lacks a steady-state dataset where carbon flows in a CO<sub>2</sub>+H<sub>2</sub> fermentation are quantified. Here we aimed to quantify steady-state CO<sub>2</sub>+H<sub>2</sub> fermentation using fully instrumented chemostats and the model acetogen *C. autoethanogenum*. Subsequently, we showed that CO<sub>2</sub> is a promising feedstock alternative to CO, as more than half of the substrate CO<sub>2</sub> carbon was converted into ethanol. Furthermore, supplementation with CO at low concentrations improved fermentation performance significantly.

## Materials and Methods

### Bacterial strain, growth medium, and continuous culture conditions

A derivate of *Clostridium autoethanogenum* DSM 10061 strain—DSM 19630—deposited in the German Collection of Microorganisms and Cell Cultures (DSMZ) was used in all experiments and stored as glycerol stocks at – 80 °C. This non-commercial strain was grown on CO<sub>2</sub>+H<sub>2</sub> (~23% CO<sub>2</sub>, ~67% H<sub>2</sub> and ~10% Ar; BOC Australia) and CO/CO<sub>2</sub>/H<sub>2</sub> (~2% CO, ~23% CO<sub>2</sub>, ~65% H<sub>2</sub>, and ~10% Ar; BOC Australia) in chemically defined medium (Valgepea et al., 2017). Cells were grown under strictly anaerobic conditions at 37 °C and at a pH of 5 (maintained by 5 M NH<sub>4</sub>OH). Chemostat continuous culture achieved steady-states at dilution rates (D) = 0.47 ± 0.01 (CO<sub>2</sub>+H<sub>2</sub>; specific growth rate (μ) = 0.0196 ± 0.0004 [average ± standard deviation]), 0.5 ± 0.01, and 1 ± 0.01 day<sup>-1</sup> (CO/CO<sub>2</sub>/H<sub>2</sub>; μ = 0.021 ± 0.0004, and 0.042 ± 0.0008 h<sup>-1</sup> respectively). See Table 1 for steady-state gas-liquid mass transfer rate data. The steady-state results reported here were collected after optical density (OD), gas uptake and

## Enhancing CO<sub>2</sub>-valorization using *Clostridium autoethanogenum* for sustainable fuel and chemicals production

production rates had been stable in chemostat mode for at least three working volumes. See Valgepea et al. (2017a) for details on equipment.

### Experimental analysis

#### Biomass concentration and extracellular metabolome analyses

Biomass concentration (gDCW/L) was estimated and extracellular metabolome analysis carried out as specified in Valgepea et al. (2018).

#### Bioreactor off-gas analysis

Bioreactor off-gas was analyzed by an online Hiden HPR-20-QIC mass spectrometer. The Faraday Cup detector monitored the intensities of H<sub>2</sub>, CO, ethanol, H<sub>2</sub>S, Ar, and CO<sub>2</sub> at 2, 14, 31, 34, 40, and 44 amu, respectively, in the bioreactor off-gas. These masses were chosen so that each target compound would be represented by a unique signal. This was determined to be essential to achieve the highest confidence in quantification using preliminary experiments as interferences from other compounds at a shared mass could not be reliably accounted for (e.g. the more intense signal from CO at 28 amu could not be used due to the uncertainty of interference at 28 amu from the CO<sub>2</sub> fragment). Gas from the cylinder was used as the calibration gas for each MS-cycle (i.e. ‘online calibration’) to achieve reliable off-gas analysis (Valgepea et al., 2017). See below for details on quantification of gas uptake and production rates.

### Quantification

#### Gas uptake and production rates

Gas uptake (CO, CO<sub>2</sub> and H<sub>2</sub>) and production (ethanol) were determined using “online calibration” of the MS by analyzing the respective feed gas directly from the cylinder after each analysis cycle of the bioreactors. Specific rates (mmol/gDCW/h) were calculated by taking into account the exact composition of the respective gas, bioreactor liquid working volume, feed gas flow rate, off-gas flow rate (based on the fractional difference of the inert gas [Ar] in the feed and off-gas composition), the molar volume of ideal gas, and the steady-state biomass concentration.

#### Carbon balance analysis

The carbon balances were determined at  $116 \pm 11\%$ ,  $103 \pm 12\%$ , and  $108 \pm 11\%$  for CO<sub>2</sub>+H<sub>2</sub>, and CO/CO<sub>2</sub>/H<sub>2</sub> at D = 0.5 and 1 day<sup>-1</sup> respectively (total C-mol products/total C-mol substrates), as specified in Valgepea et al. (2017).

#### Genome-scale metabolic modelling with GEM iCLAU786

Model simulations were performed using genome scale model (GEM) iCLAU786 of *C. autoethanogenum* and flux balance analysis (FBA) (Orth and Palsson, 2011) as specified in Valgepea et al. (2018). Briefly, we used FBA to estimate intracellular fluxes (SIM1–26) and predict “optimal” growth phenotypes for experimental conditions (SIM27–62) using either maximization of ATP dissipation or biomass yield, respectively, as the objective function. Complete simulation results identified as SIMx

## Enhancing CO<sub>2</sub>-valorization using *Clostridium autoethanogenum* for sustainable fuel and chemicals production

(e.g. SIM1) in the text are in Supplementary Files. SIM1-19, 27-41, and 49-55 are from Valgepea et al. (2018). In addition to details described in Valgepea et al. (2018), CO<sub>2</sub> reduction to formate was forced from the formate dehydrogenase (FdhA) reaction scheme (rxn00103\_c0, SIM17-30) to the FdhA/Hydrogenase ABCDE complex (HytABCDE) reaction scheme (rxn08518\_c0, SIM31-40) when maximizing for biomass formation, as described by Mock et al. (2015). SIM56-62 also stopped export of pyruvate (rxn05469\_c0), a decision validated by HPLC data.

## Results

### *Clostridium autoethanogenum* steady-state fermentation of carbon dioxide and hydrogen

*Clostridium autoethanogenum* cells reached steady-state when growing on CO<sub>2</sub>+H<sub>2</sub> in chemostats at dilution rate (D) ~0.5 day<sup>-1</sup> (specific growth rate (μ) ~0.02 h<sup>-1</sup>) with a biomass concentration of 0.18 ± 0.02 g dry cell weight (gDCW)/L (Figure 1A). It is important to note that attempts to reach a steady-state at D = 1 day<sup>-1</sup> were unsuccessful. Unlike the chemostat cultures of *C. autoethanogenum* with CO (Valgepea et al., 2018; 2017a) and CO<sub>2</sub>+H<sub>2</sub> retentostat cultures (Mock et al., 2015), the CO<sub>2</sub>+H<sub>2</sub> cultures could not reach stable biomass concentrations before the culture began oscillation cycles; previously observed above ~1.6 gDCW/L (Valgepea et al., 2017). The physiological reason and mechanism for such oscillatory culture behavior are under investigation, but we assumed that cell recycling is a requirement for CO<sub>2</sub>+H<sub>2</sub> culture stability. For example, Molitor et al. (2019) showed consistent, high-biomass concentration and high-acetate CO<sub>2</sub>+H<sub>2</sub> fermentation with *Clostridium ljungdahlii* in a retentostat with complete recycling.

Despite the attempt to reach a steady-state at D = 1 day<sup>-1</sup>, cells reached steady-state at dilution rate = 0.5 day<sup>-1</sup>. Under those conditions, the specific production rates of ethanol and acetate were 140 ± 10 and 113 ± 9 mmol/gDCW/day, respectively (Figure 1C). Strikingly, the specific rate of carbon incorporation (i.e. qCO<sub>2</sub>) was 480 ± 80 mmol/gDCW/day (Figure 1B), and around half of that carbon was captured as ethanol (54 ± 3 mol%) (Figure 1D). Fermentation conditions and titers are available in Table 1, showing an impressive ethanol concentration compared to previous fermentations where CO was the main carbon and energy source.

Despite the different dilution rate, the CO<sub>2</sub>+H<sub>2</sub> results generated were compared to previously published chemostat cultures of *C. autoethanogenum* grown on CO, syngas, and CO+H<sub>2</sub> (Valgepea et al., 2018) at similar biomass concentrations (~0.5 gDCW/L) (Figure 1B, C & D). Specific rates of acetate and ethanol production achieved here for CO<sub>2</sub>+H<sub>2</sub> cultures fell between those for syngas (■) and CO+H<sub>2</sub> (■) cultures (Figure 1B & D). However, the specific rate of carbon incorporation was higher for CO<sub>2</sub>+H<sub>2</sub> (Figure 1C). We found that more than half of the captured CO<sub>2</sub> was converted into ethanol (Figure 1D). These results were encouraging, especially as ethanol production has unfavorable stoichiometry compared to acetate (Mock et al., 2015). Furthermore, the H<sub>2</sub> specific uptake rate (1130 ± 160 mmol/gDCW/day) showed that higher H<sub>2</sub> uptake rates are achievable (compared to old datasets). These results show that higher carbon yields are possible (Valgepea et al., 2018). To further investigate the metabolic demand and the feasibility of CO<sub>2</sub>+H<sub>2</sub> fermentation, we utilized the steady-state dataset



## Enhancing CO<sub>2</sub>-valorization using *Clostridium autoethanogenum* for sustainable fuel and chemicals production

as constraints for the GEM to find candidate mechanisms for improving CO<sub>2</sub>+H<sub>2</sub> fermentation using iCLAU786.

### Metabolic model of carbon dioxide and hydrogen fermentation

Estimation of intracellular processes constrained by *in vivo* datasets represents an important developmental step for progressing acetogenic CO<sub>2</sub> valorization. Here, for instance, comparing CO<sub>2</sub>+H<sub>2</sub> and CO-containing fermentation fluxes was possible (Figure 2). See Supplementary Files for complete details.

Intracellular metabolite fluxes from the FBA showed remarkable similarity to the combined theoretical stoichiometry of acetate and ethanol production (Mock et al., 2015) and indicated energetic cofactor circuits with mapping close to 1:1 (experimental:theoretical stoichiometry; Supplementary Files). Ethanol production likely occurred *via* acetaldehyde:ferredoxin oxidoreductase (AOR; leq000004) under autotrophic conditions, with the HytABCDE (leq000001) and Nfn complex (leq000002) likely facilitating cofactor production *via* electron bifurcation (Figure 2) (Valgepea et al., 2018). This is a mechanism for minimization of free energy loss employed by *C. autoethanogenum* and may play a key role in sustaining proton motive force by balancing acetate, ethanol, and ATP production (Mock et al., 2015; Valgepea et al., 2018). Engineering acetogens to redirect this energy towards cellular growth, sacrificing some ethanol production, could be beneficial for CO<sub>2</sub> fermentation (Emerson and Stephanopoulos, 2019).

It was notable that, unlike CO fermentations, the pyruvate:ferredoxin oxidoreductase (PFOR; rxn05938\_c0; acetyl-CoA ↔ pyruvate) flux was not significantly in the direction of pyruvate (Figure 2) (Valgepea et al., 2018). Under autotrophic conditions, PFOR links the WLP to anabolic pathways associated with biomass (Furdui and Ragsdale, 2000), and therefore this indicated high cell-specific energetic limitation. From this observation, we hypothesized that CO supplementation could provide a potential solution, as CO oxidation would generate Fd<sub>red</sub>. Furthermore, an ATP/H<sub>2</sub> flux ratio of ~0.15 was observed here compared to an ATP/CO ratio of ~0.28 in CO only fermentations (Valgepea et al., 2018). Considering CO+H<sub>2</sub> and CO<sub>2</sub>+H<sub>2</sub> fermentations had equal carbon-flux through the WLP (~10 mmol/gDCW/h; Figure 2), supplementation with renewable CO from CO<sub>2</sub> electrolysis could control biomass formation and culture stability. A similar process (but CO fermentation) was detailed by Haas et al. (2018).

### *Clostridium autoethanogenum* steady-state fermentation of carbon dioxide and hydrogen supplemented with carbon monoxide

To validate our modelling hypothesis, *Clostridium autoethanogenum* was cultured with a low concentration of carbon monoxide in addition to CO<sub>2</sub> and H<sub>2</sub> (CO/CO<sub>2</sub>/H<sub>2</sub>) in chemostats. A steady-state was reached at D = 0.5 day<sup>-1</sup> (μ ~0.02 h<sup>-1</sup>), and at D = 1 day<sup>-1</sup> (μ ~0.04 h<sup>-1</sup>; Figure 1A; biomass concentrations of 0.54 ± 0.01 and 0.34 ± 0.02 gDCW/L respectively). CO/CO<sub>2</sub>/H<sub>2</sub> fermentations at a D = 1 day<sup>-1</sup> (CO/CO<sub>2</sub>/H<sub>2</sub><sup>1</sup>) and a D = 0.5 day<sup>-1</sup> (CO/CO<sub>2</sub>/H<sub>2</sub><sup>0.5</sup>) showed simultaneous uptake of CO (89 ± 2 and 36 ± 4 mmol/gDCW/day, respectively) and CO<sub>2</sub> (940 ± 20 and 540 ± 20 mmol/gDCW/day, respectively) (Figure 1B). The co-utilization of both C1 gases is, to the best of our

## Enhancing CO<sub>2</sub>-valorization using *Clostridium autoethanogenum* for sustainable fuel and chemicals production

knowledge, an unquantified phenomenon. This led to a specific carbon incorporation (CO/CO<sub>2</sub>/H<sub>2</sub><sup>1</sup> – 1030 ± 30 mmol/gDCW/day) larger than any other gas type (maximum of ~450 mmol/gDCW/day for fermentations with CO in Valgepea et al. (2018) or CO<sub>2</sub>+H<sub>2</sub> in this work). This also resulted in significant improvements to culture performance compared to CO<sub>2</sub>+H<sub>2</sub> fermentations.

Compared to CO<sub>2</sub>+H<sub>2</sub>, CO/CO<sub>2</sub>/H<sub>2</sub><sup>0.5</sup> showed higher acetate and ethanol titers (Table 1) and specific productivities (Figure 1C), and a higher ethanol/acetate ratio (2.15 vs 1.24 mol/mol respectively). While at a similar biomass concentration (CO/CO<sub>2</sub>/H<sub>2</sub><sup>1</sup> best comparison due to similarity in dilution rate), acetate and ethanol titers (Table 1), and specific productivities (Figure 1C) are greater than during fermentation of other CO-containing gases. When comparing to high biomass (~1.4 gDCW/L) CO cultures, CO-supplementation still performs impressively – CO+H<sub>2</sub> fermentation achieved a higher ethanol titer (11.6 ± 0.4 g/L), while CO and syngas fermentations were similar (3.9 ± 0.2 and 5.4 ± 0.3 g/L respectively). Otherwise, all specific productivities were higher for CO/CO<sub>2</sub>/H<sub>2</sub><sup>1</sup> (Supplementary Files). Furthermore, the distribution of carbon to ethanol was still greater than 50% (Figure 1D; 53.8 ± 0.4 % and 66 ± 2% for CO/CO<sub>2</sub>/H<sub>2</sub><sup>1</sup> and CO/CO<sub>2</sub>/H<sub>2</sub><sup>0.5</sup> respectively).

To understand the metabolic effects of supplementing CO, FBA was performed using the same conditions and alterations as for CO<sub>2</sub>+H<sub>2</sub> (Figure 2). Notably, the WLP specific flux throughput for CO/CO<sub>2</sub>/H<sub>2</sub><sup>1</sup> was ~2-fold greater than for any other gas type (including high-biomass [Valgepea et al., 2018]). Furthermore, for CO<sub>2</sub> fermentations, Nfn complex flux direction was opposite that of CO and syngas fermentations. CO/CO<sub>2</sub>/H<sub>2</sub><sup>0.5</sup> also showed significantly greater flux through the AOR, whilst specific WLP productivity was insignificantly different compared to CO<sub>2</sub>+H<sub>2</sub>.

## Discussion

Achieving steady-state continuous cultures using CO<sub>2</sub>+H<sub>2</sub> mixtures, without cell recycling here, was challenging. Yet, compared to other organisms fermenting CO<sub>2</sub>+H<sub>2</sub> with continuous medium exchange, *Clostridium autoethanogenum* performs well (Table 2). No direct comparisons can be made to other experiments due to variations in conditions, but *C. autoethanogenum* clearly achieves the highest ethanol production, with comparable quantities of carbonous products also. *Acetobacterium woodii*, along with *Sporomusa ovata*, were shown to perform well when compared to a wide range of acetogens under batch CO<sub>2</sub>+H<sub>2</sub> conditions (Groher and Weuster-Botz, 2016). Yet, as evidenced by omission of *S. ovata* from Table 2, few continuous culture characterizations of acetogens are available – an essential step for validation of industrial robustness in gas fermentation. As discussed by Molitor et al. (2019), the lack of yeast extract or C<sub>≥2</sub> substrates is also distinguishing between fermentations.

Notably, CO<sub>2</sub>+H<sub>2</sub> cultures displayed higher variability between biological replicates compared to those of CO-containing gas mixtures (Figure 1) (Valgepea et al., 2017). This may indicate variable organism fitness, a trait previously discussed for *C. autoethanogenum* by Liew et al. (2016), who extensively covered numerous techniques used for enhancing gas fermentation including – coupling to other processes, adaptive laboratory evolution, and metabolic engineering of acetogens using genetic tools. CO-supplementation could be a valuable option for enhancement as it overcomes inherent

## Enhancing CO<sub>2</sub>-valorization using *Clostridium autoethanogenum* for sustainable fuel and chemicals production

problems linked to engineering acetogens. Supplementation of low quantities of CO here stabilized the culture, enabled culturing at  $D = 1 \text{ day}^{-1}$ , and achieved higher biomass concentration with a carbon incorporation larger than any other gas type – all without compromising by-product distribution.

While Valgepea et al. (2018) found that syngas fermentation lead to CO-only fermentation at steady-state, we observed co-utilization of CO and CO<sub>2</sub>. Tizard and Sechrist (2015) have also shown co-utilization for *C. autoethanogenum* continuous cultures, and it seems that co-uptake may also occur for some points of syngas batch fermentation ([preprint] Infantes et al., 2020). Co-utilization of sugars was found for *E. coli* in chemostats – where inhibition of consumption, but no change in induction time was observed (Standing et al., 1972). The WLP is most likely no different, in that metabolism of CO is preferential, yet the pathway can co-consume CO<sub>2</sub> under certain conditions.

Various efforts have been made towards enhancing CO<sub>2</sub>(+H<sub>2</sub>) fermentation to C<sub>2</sub> products (Table 2) (Emerson and Stephanopoulos, 2019). Braun and Gottschalk (1981) first discovered the potential for enhancement when *Acetobacterium woodii* simultaneously consumed fructose and a headspace of CO<sub>2</sub>+H<sub>2</sub> during batch cultivation. Growth and acetate production was high but no characterization of the headspace was performed. More recently, continuous glucose-supplemented CO<sub>2</sub>+H<sub>2</sub> fermentation of *Moorella thermoacetica* by Park et al. (2019) did not lead to net uptake of CO<sub>2</sub>. Furthermore, Jones et al. (2016) did not show net CO<sub>2</sub> uptake for a wide range of acetogens (not *A. woodii*) fermenting syngas and fructose. *A. woodii* generates a sodium ion (Na<sup>+</sup>) gradient (Hess et al., 2013) rather than a proton (H<sup>+</sup>) gradient for membranous ATP generation (Bengelsdorf et al., 2018; Pierce et al., 2008; Poehlein et al., 2015). This may highlight an important metabolic difference from other model acetogens – decoupling the resources of the WLP and membranous ATP generation pathways could facilitate fermentation of sugar and CO<sub>2</sub>+H<sub>2</sub> simultaneously.

Other enhancements have also struggled to achieve net CO<sub>2</sub> uptake. Co-culture of *C. acetobutylicum* and *C. ljungdahlii* showed syntrophic metabolic coupling when fermenting glucose, fructose, and CO<sub>2</sub>+H<sub>2</sub>, but no net CO<sub>2</sub> uptake (Charubin and Papoutsakis, 2019). Addition of nitrate to batch CO<sub>2</sub>+H<sub>2</sub> fermentation by *C. ljungdahlii*, increased biomass concentration and subsequently volumetric productivity of acetate (Emerson et al., 2019). However, the specific WLP productivity decreased, meaning lower utilization of CO<sub>2</sub>. Other organisms not recognized as gas fermenters can also use mixotrophy to minimize carbon loss, such as *Clostridium beijerinckii* but have not displayed net CO<sub>2</sub> uptake either (Sandoval-Espinola et al., 2017). To the best of our knowledge, this is the first report where supplementation of a substrate other than H<sub>2</sub>, increased productivities of continuous acetogenic CO<sub>2</sub> fermentation while maintaining net CO<sub>2</sub> utilization. Furthermore, the effect of CO supplementation on CO<sub>2</sub> utilization was superlinear, indicating a synergistic mechanism (Park et al., 2019). This is encouraging for development of bioprocesses valorizing CO<sub>2</sub>.

Comparisons between fermentation datasets enables us to speculate about the positive effect of CO-supplementation on CO<sub>2</sub>+H<sub>2</sub> fermentation. Although, addition of CO led to minimal metabolic shifts (Figure 2 – CO<sub>2</sub>+H<sub>2</sub> vs CO/CO<sub>2</sub>/H<sub>2</sub><sup>0.5</sup> and Supplementary Files), FBA showed that CO supplementation caused significant increases to the



## Enhancing CO<sub>2</sub>-valorization using *Clostridium autoethanogenum* for sustainable fuel and chemicals production

reduced ferredoxin consumption by AOR and Rnf complex (leq000004 and M002, respectively) compared to CO<sub>2</sub>+H<sub>2</sub> (Figure 2). The overflow model proposed by Richter et al. (2016) suggests that high NADH production *via* Rnf and Nfn complexes (leq000002) is also important for reducing AOR product inhibition. In this way, NADH facilitates fast metabolism of acetaldehyde to ethanol *via* alcohol dehydrogenase (Adh(E); rxn00543\_c0). Decreasing the acetate concentration reduces acidification and the ATP cost for excreting acetate (Valgepea et al., 2018). Including acetaldehyde conversion to ethanol and association to acetic acid, this also leads to consumption of 2 H<sup>+</sup> (4 here vs 2 produced *via* CODH). Therefore, CO consumption decreases the intracellular H<sup>+</sup> pool, and following Le Chatelier's principle, drives HytABCDE activity. Indeed, the change in specific H<sub>2</sub> uptake relative to specific CO<sub>2</sub> uptake is greater than that of CO (for CO<sub>2</sub>+H<sub>2</sub> vs CO/CO<sub>2</sub>/H<sub>2</sub> at D = 0.5 day<sup>-1</sup>, Supplementary Files). Subsequently, the relative gain in free energy from H<sub>2</sub> is ~ 4-fold greater than CO. We speculate this is ultimately responsible for the improved fitness of CO-supplemented CO<sub>2</sub>+H<sub>2</sub> fermentation by *C. autoethanogenum*. We propose the following five critical factors to this enhanced metabolism: [1] metabolism of CO increases the intracellular pool of reduced ferredoxin; [2] this stimulates oxidation of ferredoxin, which if consumed by the AOR; [3] reduces ATP costs; and [4] decreases the H<sup>+</sup> pool/acidification; which therefore [5] drives H<sub>2</sub> uptake for further reduction of ferredoxin. Evidently, additional understanding of acetogenic redox metabolism, from a thermodynamic perspective, is important for developing acetogenic CO<sub>2</sub>-valorization as a platform industrial bioprocess (Cueto-Rojas et al., 2015).

Physicochemical properties could also play a key role in CO-supplementation enabling to achieve a stable CO<sub>2</sub>+H<sub>2</sub> chemostat culture at D = 1 day<sup>-1</sup>. Generation of a stable and large non-equilibrium is what drives microbial growth (Igamberdiev and Kleczkowski, 2009; Qian and Beard, 2005; Quémener and Bouchez, 2014) and gas-liquid mass transfer (Ma et al., 2005). For continuous culture of gas fermenting microbes, an inherent relationship between substrate mass transfer and culture growth exists (Supplementary Files). An important parameter for these systems is the Gibb's free energy of a system (Cueto-Rojas et al., 2015). This describes the thermodynamic favorability of the reaction system – termed spontaneity. Here, analysis of experimental flux and Gibbs free energy suggests that CO<sub>2</sub>+H<sub>2</sub> fermentation is infeasible ( $\Delta\dot{G}_{OR}^0 = 5.4 \text{ kJ/mol/day}$ ), whereas CO-supplemented CO<sub>2</sub>+H<sub>2</sub> fermentation is feasible ( $\Delta\dot{G}_{OR}^0 = -12.3 \text{ kJ/mol/day}$ ; Supplementary Files). Though these calculations use standard conditions, they do indicate how close CO<sub>2</sub>+H<sub>2</sub> fermentation is to the thermodynamic limit of metabolism. Theoretically, minute and unobservable changes to chemostat CO<sub>2</sub>+H<sub>2</sub> fermentation can disrupt the culture (Henry and Martin, 2016). Thus, increasing the free energy of central metabolism with CO-supplementation appears to keep metabolism in a spontaneous and stable state by increasing reduced ferredoxin production.

The mechanisms for achieving the 2-fold higher specific WLP flux throughput for CO/CO<sub>2</sub>/H<sub>2</sub><sup>1</sup> compared to others is less clear but appears to be linked to the difference in primary substrate. CO/CO<sub>2</sub>/H<sub>2</sub><sup>1</sup> and CO+H<sub>2</sub> are the most similar CO<sub>2</sub> and CO fermentations, respectively (D ~ 1 day<sup>-1</sup> and carbon to hydrogen feed ratio (~1:3); Table 1), and the maximum carbon incorporation per cell for CO+H<sub>2</sub> was roughly half of that of CO/CO<sub>2</sub>/H<sub>2</sub><sup>1</sup> (~450 vs ~1000 mmol/gDCW). Theoretically, cells will maximize

## Enhancing CO<sub>2</sub>-valorization using *Clostridium autoethanogenum* for sustainable fuel and chemicals production

carbon-to-redox metabolism by minimizing thermodynamic losses. CO supplementation to a CO<sub>2</sub>+H<sub>2</sub> culture seems to facilitate this as (H<sub>2</sub>/carbon)<sub>feed</sub> – (H<sub>2</sub>/carbon)<sub>flux</sub> was ~0 mol/mol for CO/CO<sub>2</sub>/H<sub>2</sub> fermentations only (Supplementary Files) – an indication of the relative magnitude of carbon and redox metabolism. This suggests that high specific fluxes for CO/CO<sub>2</sub>/H<sub>2</sub><sup>1</sup> may be a result of (close to) optimal co-factor recycling by *C. autoethanogenum*'s WLP and redox pathway. Thus, the lower energy associated with CO<sub>2</sub> fermentation may, counterintuitively, stimulate specific WLP activity when in the presence of appropriate energy-containing substrates. Further quantifications of CO<sub>2</sub> metabolism and characterizations of enzyme activities are required to confirm these hypotheses (Supplementary Files), as they assist our ability to engineer the links between redox and carbon metabolisms.

We established a dataset quantifying steady-state of the model acetogen *C. autoethanogenum* during autotrophic-CO<sub>2</sub>+H<sub>2</sub> growth in chemostat cultures. This enabled analysis *via* FBA, and highlighted CO as a potential supplement. CO supplementation successfully improved metabolic stability and CO<sub>2</sub> utilization. This was the first time that intracellular fluxes for net uptake of CO<sub>2</sub> (with enhancement) were characterized. Industry is actively developing gas fermentation to valorize CO<sub>2</sub> (Haas et al., 2018 & Tizard and Sechrist, 2015). Previously, genetic and process engineering of gas fermentation successfully developed the technology for industrial CO valorization (Liew et al., 2016). Therefore, progression to industrial CO<sub>2</sub> valorization is foreseeable, and CO supplementation may play a role in the continuing diversification of industrial gas fermentation.

### Conflict of Interest

The authors declare that this study received funding from the Australian Research Council (ARC), partly funded by LanzaTech (ARC LP140100213). The ARC had no involvement with the study. LanzaTech has interest in commercializing gas fermentation with *C. autoethanogenum*. RT, SDS and MK are employees of LanzaTech.

### Author Contributions

All authors viewed and approved the manuscript. All authors contributed significantly to the work. KV, EM, and LN conceived the project. JH, KV and EM designed the experiments and analysed the results. JH and KV performed experiments, supported by RL, IC, MP, and EM. JH wrote the manuscript with the help of KV, EM, RT, SS, MK, and LN.

### Funding

This study was funded by a Grant from the Australian Research Council, partly funded by LanzaTech (ARC LP140100213).

### Acknowledgments

Elements of this research utilized equipment and support provided by the Queensland node of Metabolomics Australia, an initiative of the Australian Government being conducted as part of the NCRIS National Research Infrastructure for Australia. IC

## Enhancing CO<sub>2</sub>-valorization using *Clostridium autoethanogenum* for sustainable fuel and chemicals production

would like to acknowledge support from the German Academic Exchange Service (DAAD) through the "DAAD Kurzstipendien für Doktoranden". We thank the following investors in LanzaTech's technology: Sir Stephen Tindall, Khosla Ventures, Qiming Venture Partners, Softbank China, the Malaysian Life Sciences Capital Fund, Mitsui, Primetals, CICC Growth Capital Fund I, L.P. and the New Zealand Superannuation Fund. There was no funding support from the European Union for the experimental part of the study. However, KV acknowledges support also from the European Union's Horizon 2020 research and innovation programme under grant agreement N810755.

### Contribution to the field

Acetogenic bacteria comprise an ancient lineage and play a major role in global carbon cycle (accounting for at least 10<sup>13</sup> kg of acetate produced annually and 20% of the fixed carbon on earth). Due to their ability to grow autotrophically on carbonous waste-gas feedstocks, these organisms have gained significant interest in biotechnological applications. However, acetogens are considered living at the thermodynamic edge of life when growing autotrophically. Although they have evolved sophisticated strategies to conserve energy from reduction potential differences between major redox couples, this coupling is sensitive to small changes in thermodynamic equilibria. In the manuscript, we present experimental data showing CO<sub>2</sub> conversion to ethanol by an acetogenic bacteria used for industrial scale gas fermentation. Furthermore, we showed that supplementing CO enhances CO<sub>2</sub>+H<sub>2</sub> fermentation performance significantly. Analysis was only possible due to the first rigorously quantified dataset from continuous CO<sub>2</sub> and H<sub>2</sub> fermentation. This enabled discovery of notable insights into metabolic function – providing a potential guide for metabolic engineering. Therefore, here we outline that *Clostridium autoethanogenum* offers a promising route for the sustainable production of fuels and chemicals from a wide range of waste feedstocks – including CO<sub>2</sub>.

### Supplementary Files

The Supplementary Files for this article can be found online.

### References

- Adamberg, K., Valgepea, K., and Vilu, R. (2015). Advanced continuous cultivation methods for systems microbiology. *Microbiol. (United Kingdom)* 161, 1707–1719. doi:10.1099/mic.0.000146.
- Artz, J., Müller, T. E., Thenert, K., Kleinekorte, J., Meys, R., Sternberg, A., et al. (2018). Sustainable Conversion of Carbon Dioxide: An Integrated Review of Catalysis and Life Cycle Assessment. *Chem. Rev.* 118, 434–504. doi:10.1021/acs.chemrev.7b00435.
- Bengelsdorf, F. R., Beck, M. H., Erz, C., Hoffmeister, S., Karl, M. M., Riegler, P., et al. (2018). Bacterial Anaerobic Synthesis Gas (Syngas) and CO<sub>2</sub> + H<sub>2</sub> Fermentation. *Adv. Appl. Microbiol.* doi:10.1016/bs.aambs.2018.01.002.

## Enhancing CO<sub>2</sub>-valorization using *Clostridium autoethanogenum* for sustainable fuel and chemicals production

- 464 Braun, K., and Gottschalk, G. (1981). Effect of molecular hydrogen and carbon dioxide  
465 on chemo-organotrophic growth of *Acetobacterium woodii* and *Clostridium*  
466 *aceticum*. *Arch. Microbiol.* 128, 294–298. doi:10.1007/BF00422533.
- 467 Charubin, K., and Papoutsakis, E. T. (2019). Direct cell-to-cell exchange of matter in a  
468 synthetic *Clostridium* syntrophy enables CO<sub>2</sub> fixation, superior metabolite yields,  
469 and an expanded metabolic space. *Metab. Eng.* 52, 9–19.  
470 doi:10.1016/j.ymben.2018.10.006.
- 471 Claassens, N. J., Sousa, D. Z., dos Santos, V. A. P. M., de Vos, W. M., and van der  
472 Oost, J. (2016). Harnessing the power of microbial autotrophy. *Nat. Rev.*  
473 *Microbiol.* 14, 692–706. doi:10.1038/nrmicro.2016.130.
- 474 Cueto-Rojas, H. F., van Maris, A. J. a. J. A., Wahl, S. A., and Heijnen, J. J. J. (2015).  
475 Thermodynamics-based design of microbial cell factories for anaerobic product  
476 formation. *Trends Biotechnol.* 33, 534–546. doi:10.1016/j.tibtech.2015.06.010.
- 477 Detz, R. J., Reek, J. N. H., and Van Der Zwaan, B. C. C. (2018). The future of solar  
478 fuels: When could they become competitive? *Energy Environ. Sci.* 11, 1653–1669.  
479 doi:10.1039/c8ee00111a.
- 480 Drake, H. L., Gößner, A. S., and Daniel, S. L. (2008). Old acetogens, new light. *Ann. N.*  
481 *Y. Acad. Sci.* 1125, 100–128. doi:10.1196/annals.1419.016.
- 482 Emerson, D. F., and Stephanopoulos, G. (2019). Limitations in converting waste gases  
483 to fuels and chemicals. *Curr. Opin. Biotechnol.* 59, 39–45.  
484 doi:https://doi.org/10.1016/j.copbio.2019.02.004.
- 485 Emerson, D. F., Woolston, B. M., Liu, N., Donnelly, M., Currie, D. H., and  
486 Stephanopoulos, G. (2019). Enhancing hydrogen-dependent growth of and carbon  
487 dioxide fixation by *Clostridium ljungdahli* through nitrate supplementation.  
488 *Biotechnol. Bioeng.* 116, 294–306. doi:10.1002/bit.26847.
- 489 Fast, A. G., and Papoutsakis, E. T. (2012). Stoichiometric and energetic analyses of  
490 non-photosynthetic CO<sub>2</sub>-fixation pathways to support synthetic biology strategies  
491 for production of fuels and chemicals. *Curr. Opin. Chem. Eng.* 1, 380–395.  
492 doi:10.1016/j.coche.2012.07.005.
- 493 Furdui, C., and Ragsdale, S. W. (2000). The role of pyruvate ferredoxin oxidoreductase  
494 in pyruvate synthesis during autotrophic growth by the Wood-Ljungdahl pathway.  
495 *J. Biol. Chem.* 275, 28494–28499. doi:10.1074/jbc.M003291200.
- 496 Glenk, G., and Reichelstein, S. (2019). Economics of converting renewable power to  
497 hydrogen. *Nat. Energy* 4. doi:10.1038/s41560-019-0326-1.
- 498 Götz, M., Lefebvre, J., Mörs, F., McDaniel Koch, A., Graf, F., Bajohr, S., et al. (2016).  
499 Renewable Power-to-Gas: A technological and economic review. *Renew. Energy*  
500 85, 1371–1390. doi:10.1016/j.renene.2015.07.066.
- 501 Groher, A., and Weuster-Botz, D. (2016). Comparative reaction engineering analysis of



# Enhancing CO<sub>2</sub>-valorization using *Clostridium autoethanogenum* for sustainable fuel and chemicals production

- 502 different acetogenic bacteria for gas fermentation. *J. Biotechnol.* 228, 82–94.  
503 doi:10.1016/j.jbiotec.2016.04.032.
- 504 Haas, T., Krause, R., Weber, R., Demler, M., and Schmid, G. (2018). Technical  
505 photosynthesis involving CO<sub>2</sub> electrolysis and fermentation. *Nat. Catal.* 1, 32–39.  
506 doi:10.1038/s41929-017-0005-1.
- 507 Handler, R. M., Shonnard, D. R., Griffing, E. M., Lai, A., and Palou-Rivera, I. (2016).  
508 Life Cycle Assessments of Ethanol Production via Gas Fermentation: Anticipated  
509 Greenhouse Gas Emissions for Cellulosic and Waste Gas Feedstocks. *Ind. Eng.*  
510 *Chem. Res.* 55, 3253–3261. doi:10.1021/acs.iecr.5b03215.
- 511 Henry, A., and Martin, O. C. (2016). Short relaxation times but long transient times in  
512 both simple and complex reaction networks. *J. R. Soc. Interface.*  
513 doi:https://doi.org/10.1098/rsif.2016.0388.
- 514 Hess, V., Schuchmann, K., and Müller, V. (2013). The ferredoxin: NAD<sup>+</sup>  
515 Oxidoreductase (Rnf) from the acetogen acetobacterium woodii requires na<sup>+</sup> and is  
516 reversibly coupled to the membrane potential. *J. Biol. Chem.* 288, 31496–31502.  
517 doi:10.1074/jbc.M113.510255.
- 518 Hoffmeister, S., Gerdorf, M., Bengelsdorf, F. R., Linder, S., Flüchter, S., Öztürk, H., et  
519 al. (2016). Acetone production with metabolically engineered strains of  
520 *Acetobacterium woodii*. *Metab. Eng.* 36, 37–47. doi:10.1016/j.ymben.2016.03.001.
- 521 Hoskisson, P. A., and Hobbs, G. (2005). Continuous culture - Making a comeback?  
522 *Microbiology* 151, 3153–3159. doi:10.1099/mic.0.27924-0.
- 523 Hu, P., Chakraborty, S., Kumar, A., Woolston, B. M., Liu, H., Emerson, D., et al.  
524 (2016). Integrated Bioprocess for Conversion of Gaseous Substrates to Liquids.  
525 *Proc. Natl. Acad. Sci.* 113, 2–7. doi:10.1073/pnas.1516867113.
- 526 Igamberdiev, A. U., and Kleczkowski, L. A. (2009). Metabolic systems maintain stable  
527 non-equilibrium via thermodynamic buffering. *BioEssays* 31, 1091–1099.  
528 doi:10.1002/bies.200900057.
- 529 Infantes, A., Kugel, M., and Neumann, A. (2020). Effect of Cysteine , Yeast Extract ,  
530 pH Regulation and Gas Flow on Acetate and Ethanol Formation and Growth  
531 Profiles of *Clostridium ljungdahlii* Syngas Fermentation. *bioRxiv [preprint]*.  
532 doi:http://dx.doi.org/10.1101/2020.01.13.904292.
- 533 International Panel on Climate Change (IPCC) (2014). *Climate Change 2014:*  
534 *Mitigation of Climate Change*. doi:10.1017/CBO9781107415416.
- 535 IRENA (2017). Renewable Power Generation Costs in 2017.  
536 doi:10.1007/SpringerReference\_7300.
- 537 Jones, S. W., Fast, A. G., Carlson, E. D., Wiedel, C. A., Au, J., Antoniewicz, M. R., et  
538 al. (2016). CO<sub>2</sub> fixation by anaerobic non-photosynthetic mixotrophy for  
539 improved carbon conversion. *Nat. Commun.* 7, 1–9. doi:10.1038/ncomms12800.

# Enhancing CO<sub>2</sub>-valorization using *Clostridium autoethanogenum* for sustainable fuel and chemicals production

- 540 Kantzow, C., Mayer, A., and Weuster-Botz, D. (2015). Continuous gas fermentation by  
541 *Acetobacterium woodii* in a submerged membrane reactor with full cell retention.  
542 *J. Biotechnol.* 212, 11–18. doi:10.1016/j.jbiotec.2015.07.020.
- 543 Keith, D. W., Holmes, G., St. Angelo, D., and Heidel, K. (2018). A Process for  
544 Capturing CO<sub>2</sub> from the Atmosphere. *Joule* 2, 1573–1594.  
545 doi:10.1016/J.JOULE.2018.05.006.
- 546 Klask, C., Kliem-kuster, N., Molitor, B., and Angenent, L. T. (2019). An open-source  
547 multiple-bioreactor system for replicable gas- fermentation experiments : Nitrate  
548 feed results in stochastic inhibition events , but improves ethanol production of  
549 *Clostridium ljungdahlii* with CO<sub>2</sub> and H<sub>2</sub>. *bioRxiv [preprint]*.  
550 doi:https://doi.org/10.1101/2019.12.15.877050.
- 551 Liew, F. M., Martin, E., Tappel, R., Heijstra, B., Mihalcea, C., and Köpke, M. (2016).  
552 Gas Fermentation – A Flexible Platform for Commercial Scale Production of Low  
553 Carbon Fuels and Chemicals from Waste and Renewable Feedstocks. *Front.*  
554 *Microbiol.* 7, 694. doi:10.3389/fmicb.2016.00694.
- 555 Ma, Y., Yu, G., and Li, H. Z. (2005). Note on the mechanism of interfacial mass  
556 transfer of absorption processes. *Int. J. Heat Mass Transf.* 48, 3454–3460.  
557 doi:10.1016/j.ijheatmasstransfer.2005.03.008.
- 558 Mock, J., Zheng, Y., Mueller, A. P., Ly, S., Tran, L., Segovia, S., et al. (2015). Energy  
559 conservation associated with ethanol formation from H<sub>2</sub> and CO<sub>2</sub> in *Clostridium*  
560 *autoethanogenum* involving electron bifurcation. *J. Bacteriol.*  
561 doi:10.1128/JB.00399-15.
- 562 Molitor, B., Mishra, A., and Angenent, L. T. (2019). Power-to-protein: converting  
563 renewable electric power and carbon dioxide into single cell protein with a two-  
564 stage bioprocess. *Energy Environ. Sci.* doi:10.1039/C9EE02381J.
- 565 Morinaga, T., and Kawada, N. (1990). The production of acetic acid from carbon  
566 dioxide and hydrogen by an anaerobic bacterium. *J. Biotechnol.* 14, 187–194.  
567 doi:10.1007/BF02146190.
- 568 Müller, V. (2019). New Horizons in Acetogenic Conversion of One-Carbon Substrates  
569 and Biological Hydrogen Storage. *Trends Biotechnol.* 37, 1344–1354.  
570 doi:10.1016/j.tibtech.2019.05.008.
- 571 Orth, J. D., and Palsson, B. Ø. (2011). What is flux balance analysis? *Nat. Biotechnol.*  
572 28, 245–248. doi:10.1038/nbt.1614.What.
- 573 Otto, A., Grube, T., Schiebahn, S., and Stolten, D. (2015). Closing the loop: Captured  
574 CO<sub>2</sub> as a feedstock in the chemical industry. *Energy Environ. Sci.* 8, 3283–3297.  
575 doi:10.1039/c5ee02591e.
- 576 Park, J. O., Liu, N., Holinski, K. M., Emerson, D. F., Qiao, K., Woolston, B. M., et al.  
577 (2019). Synergistic substrate cofeeding stimulates reductive metabolism. *Nat.*  
578 *Metab.* 1, 643–651. doi:10.1038/s42255-019-0077-0.

# Enhancing CO<sub>2</sub>-valorization using *Clostridium autoethanogenum* for sustainable fuel and chemicals production

- 579 Pierce, E., Xie, G., Barabote, R. D., Saunders, E., Han, C. S., Detter, J. C., et al. (2008).  
580 The complete genome sequence of *Moorella thermoacetica* (f. *Clostridium*  
581 *thermoacetum*). *Environ. Microbiol.* 10, 2550–2573. doi:10.1111/j.1462-  
582 2920.2008.01679.x.
- 583 Poehlein, A., Cebulla, M., Ilg, M. M., Bengelsdorf, F. R., Schiel-bengelsdorf, B.,  
584 Whited, G., et al. (2015). The Complete Genome Sequence of *Clostridium*  
585 *aceticum*: a Missing Link between Rnf- and Cytochrome-Containing Autotrophic  
586 Acetogens. *MBio* 6, e01168-15. doi:10.1128/mBio.01168-15.Editor.
- 587 Qian, H., and Beard, D. A. (2005). Thermodynamics of stoichiometric biochemical  
588 networks in living systems far from equilibrium. *Biophys. Chem.* 114, 213–220.  
589 doi:<https://doi.org/10.1016/j.bpc.2004.12.001>.
- 590 Quémener, E. D. Le, and Bouchez, T. (2014). A thermodynamic theory of microbial  
591 growth. *ISME J.* 8, 1747–1751. doi:10.1038/ismej.2014.7.
- 592 Redl, S., Diender, M., Jensen, T. Ø., Sousa, D. Z., and Nielsen, A. T. (2017). Exploiting  
593 the potential of gas fermentation. *Ind. Crops Prod.*  
594 doi:10.1016/j.indcrop.2016.11.015.
- 595 Richter, H., Molitor, B., Wei, H., Chen, W., Aristilde, L., and Angenent, L. T. (2016).  
596 Ethanol production in syngas-fermenting *Clostridium ljungdahlii* is controlled by  
597 thermodynamics rather than by enzyme expression. *Energy Environ. Sci.*  
598 doi:10.1039/C6EE01108J.
- 599 Sakai, S., Nakashimada, Y., Inokuma, K., Kita, M., Okada, H., and Nishio, N. (2005).  
600 Acetate and ethanol production from H<sub>2</sub> and CO<sub>2</sub> by *Moorella* sp. using a repeated  
601 batch culture. *J. Biosci. Bioeng.* 99, 252–8. doi:10.1263/jbb.99.252.
- 602 Sandoval-Espinola, W. J., Chinn, M. S., Thon, M. R., and Bruno-Bárcena, J. M. (2017).  
603 Evidence of mixotrophic carbon-capture by n-butanol-producer *Clostridium*  
604 *beijerinckii*. *Sci. Rep.* 7, 1–13. doi:10.1038/s41598-017-12962-8.
- 605 Schuchmann, K., and Müller, V. (2014). Autotrophy at the thermodynamic limit of life:  
606 a model for energy conservation in acetogenic bacteria. *Nat. Rev. Microbiol.* 12,  
607 809–821. doi:10.1038/nrmicro3365.
- 608 Standing, C. N., Fredrickson, A. G., and Tsuchiya, H. M. (1972). Batch- and  
609 continuous-culture transients for two substrate systems. *Appl. Microbiol.* 23, 354–  
610 359.
- 611 Tizard, J. H., and Sechrist, P. A. (2015). Carbon Capture in Fermentation. U.S. Patent  
612 No 0,111,266. Washington, DC: U.S. Patent and Trademark Office. Available at:  
613 <https://patents.justia.com/patent/20150111266>.
- 614 Valgepea, K., De Souza Pinto Lemgruber, R., Abdalla, T., Binos, S., Takemori, N.,  
615 Takemori, A., et al. (2018). H<sub>2</sub> drives metabolic rearrangements in gas-fermenting  
616 *Clostridium autoethanogenum*. *Biotechnol. Biofuels* 11, 55. doi:10.1186/s13068-  
617 018-1052-9.

## Enhancing CO<sub>2</sub>-valorization using *Clostridium autoethanogenum* for sustainable fuel and chemicals production

Valgepea, K., de Souza Pinto Lemgruber, R., Meaghan, K., Palfreyman, R. W., Abdalla, T., Heijstra, B. D., et al. (2017). Maintenance of ATP Homeostasis Triggers Metabolic Shifts in Gas-Fermenting Acetogens. *Cell Syst.* 4.

### Figure captions

**Figure 1.** Important fermentation characteristics of *Clostridium autoethanogenum* in autotrophic chemostats. Results from Valgepea et al. (2018) are also displayed (**B**, **C** & **D**), the conditions of all fermentations are summarized in Table 1. Growth curves of novel fermentations with standard deviation at steady-state (**A**). Specific rates of uptake (**B**) and production (**C**) for important metabolites. Product carbon balances (**D**). Values represent the average  $\pm$  standard deviation between biological replicates. Number of biological replicates, and detailed gas composition for each fermentation are available in Table 1. Patterned bars indicate a D of 1 day<sup>-1</sup>, full bars indicate a D of 0.5 day<sup>-1</sup> (**B**, **C** & **D**). Abbreviations:  $q$  –specific rate,  $DCW$  – dry cell weight.

**Figure 2.** Predictions of central metabolic pathway fluxes for autotrophic fermentations of *Clostridium autoethanogenum* using iCLAU786, flux balance analysis, and chemostat data. Results from Valgepea et al. (2018) are also displayed, the conditions of these fermentations are summarized in Table 1. Fluxes (mmol/gDCW/h) are represented as the average  $\pm$  standard deviation between biological replicates. Number of biological replicates, and detailed gas composition for each fermentation are available in Table 1. Arrows show the direction of calculated fluxes; red arrows denote uptake or secretion, dashed arrows denote a series of reactions. Brackets denote metabolites bound by an enzyme. Refer to Supplementary Files for enzyme involvement, metabolite abbreviations, and complete flux balance analysis datasets.



# Enhancing CO<sub>2</sub>-valorization using *Clostridium autoethanogenum* for sustainable fuel and chemicals production

## 642 Tables and Figures

643 **Table 1.** Summary of low-biomass *Clostridium autoethanogenum* fermentations.

644

| Gas                                | y<br>(Ar to 100%)                                       | F<br>mL/min | N<br>rpm | BR<br># | D<br>day <sup>-1</sup> | BC<br>gDCW/L | ±    | Ace<br>g/L | ±    | EtOH<br>g/L | ±    |
|------------------------------------|---------------------------------------------------------|-------------|----------|---------|------------------------|--------------|------|------------|------|-------------|------|
| CO                                 | 60% CO                                                  | 50          | 510      | 4       | 1                      | 0.47         | 0.02 | 2.12       | 0.18 | 0.63        | 0.05 |
| Syngas                             | 50 % CO,<br>20% CO <sub>2</sub> ,<br>20% H <sub>2</sub> | 50          | 500      | 2       | 1                      | 0.48         | 0.04 | 4.35       | 0.12 | 0.61        | 0.06 |
| CO+H <sub>2</sub>                  | 15% CO,<br>45% H <sub>2</sub>                           | 50          | 650      | 4       | 1                      | 0.46         | 0.04 | 0.69       | 0.07 | 4.46        | 0.41 |
| CO/CO <sub>2</sub> /H <sub>2</sub> | 2% CO,<br>23% CO <sub>2</sub> ,<br>65% H <sub>2</sub>   | 30          | 1200     | 2       | 1                      | 0.34         | 0.02 | 5.03       | 0.34 | 4.79        | 0.43 |
| CO <sub>2</sub> +H <sub>2</sub>    | 23% CO <sub>2</sub> ,<br>67% H <sub>2</sub>             | 32          | 500      | 3       | 0.5                    | 0.18         | 0.02 | 2.51       | 0.42 | 2.36        | 0.25 |
| CO/CO <sub>2</sub> /H <sub>2</sub> | 2% CO,<br>23% CO <sub>2</sub> ,<br>65% H <sub>2</sub>   | 30          | 800      | 2       | 0.5                    | 0.54         | 0.01 | 5.97       | 0.98 | 9.69        | 0.39 |

645

646 The horizontal line through the middle of the table indicates where the data is from;  
647 above the line is data from (Valgepea et al., 2018), and below the line is novel data.

648 Abbreviations: y – gas compositions, F – gas flowrate, N – stirrer speed, BR –  
649 biological replicates, D – dilution rate, BC – biomass concentration, Ace – acetate  
650 concentration, EtOH – ethanol concentration, ± - plus/minus standard deviation.

651

## Enhancing CO<sub>2</sub>-valorization using *Clostridium autoethanogenum* for sustainable fuel and chemicals production

**Table 2.** Summary of quantitative and continuous CO<sub>2</sub>+H<sub>2</sub> fermentations.

| Organism                           | Strain                         | Experimental Conditions                                                                                                                                                              | Growth rate (day <sup>-1</sup> ) | C <sub>Product</sub> g[DCW]/L                                                                      | Productivity g/L/day, (g/gDCW/day)          | Ref.             |
|------------------------------------|--------------------------------|--------------------------------------------------------------------------------------------------------------------------------------------------------------------------------------|----------------------------------|----------------------------------------------------------------------------------------------------|---------------------------------------------|------------------|
| <i>Acetobacterium woodii</i>       | DSM 1030                       | 1 L chemostat, D = 0.84 day <sup>-1</sup> , 1200 rpm, 30 L/h 17% CO <sub>2</sub> , 40% H <sub>2</sub> , 43% N <sub>2</sub> , 1 atm, pH 7.0, 30 °C, 4 g/L YE, n = 1                   | μ = 0.84                         | B = 1.1<br>A = 22.0                                                                                | A = 19.1 (17.4)                             | 1                |
|                                    |                                | 1 L batch retentostat, D = 1.68 day <sup>-1</sup> , 1200 rpm, 30 L/h 17% CO <sub>2</sub> , 40% H <sub>2</sub> , 43% N <sub>2</sub> , 1 atm, pH 7.0, 30 °C, 4 g/L YE, n = 1           |                                  | B = 6.0 <sup>a,b</sup><br>A = 22.6                                                                 | A = 40 (16.0 <sup>a,b</sup> )               | 1                |
|                                    |                                | D = 4.2 day <sup>-1</sup>                                                                                                                                                            |                                  | B = 10.0 <sup>a,b</sup><br>A = 23.5                                                                | A = 95 (18.5 <sup>a,b</sup> )               |                  |
|                                    |                                | 1 L batch retentostat, D = 8.4 day <sup>-1</sup> , 1200 rpm, 30 L/h 25% CO <sub>2</sub> , 60% H <sub>2</sub> , 15% N <sub>2</sub> , 1 atm, pH 7.0, 30 °C, 4 g/L YE, n = 1            |                                  | B = 11.0<br>A = 17.6                                                                               | A = 148 (20.3)                              | 1 <sup>b,c</sup> |
|                                    | pMTL84151 _act <sub>thIA</sub> | 0.85 L batch retentostat, D = 1 day <sup>-1</sup> , 800 rpm, 30 L/h 20% CO <sub>2</sub> & 80% H <sub>2</sub> , pH 7.0, 30 °C, 2 g/L YE, 10 g/L K-acetate, n = 1                      | μ = 0                            | B = 4.6 <sup>d</sup><br>A = 48.6<br>Ac = 3.0                                                       | Ac = 0.6 (0.1)                              | 2                |
| <i>Acetobacterium</i> sp.          | BR446                          | Semi-batch retentostat, D = 24 day <sup>-1</sup> , CO <sub>2</sub> & H <sub>2</sub> , medium not specified                                                                           |                                  | B = 4.8<br>A = 3.0                                                                                 | A = 71.0 (14.7)                             | 3                |
| <i>Clostridium autoethanogenum</i> | DSM 19630                      | 0.75 L chemostat, D = 0.5 day <sup>-1</sup> , 500 rpm, 1.92 L/h 23% CO <sub>2</sub> , 67% H <sub>2</sub> , 10% Ar, 1 atm, pH 5, 37 °C, DM, n = 3                                     | μ = 0.5                          | B = 0.2<br>A = 2.5<br>E = 2.4                                                                      | B = 0.1<br>A = 1.3 (6.8)<br>E = 1.2 (6.4)   |                  |
|                                    |                                | 800 rpm, 1.8 L/h 2% CO, 23% CO <sub>2</sub> , 67% H <sub>2</sub> , 10% Ar, n = 2                                                                                                     | μ = 0.5                          | B = 0.5<br>A = 6.0<br>E = 9.7                                                                      | B = 0.3<br>A = 3.0 (5.5)<br>E = 6.3 (11.6)  | Here             |
|                                    |                                | D = 1 day <sup>-1</sup> , 1200 rpm                                                                                                                                                   | μ = 1.0                          | B = 0.3<br>A = 5.0<br>E = 4.8                                                                      | B = 0.3<br>A = 5.0 (14.6)<br>E = 6.2 (18.1) |                  |
|                                    | DSM 10061                      | 1.3 L continuous retentostat, D = 4.9 day <sup>-1</sup> , 21 L/h 23% CO <sub>2</sub> , 65% H <sub>2</sub> , 9.2% N <sub>2</sub> , pH 5.3, 37 °C, DM, 3.1 g/L ammonium acetate, n = 1 | μ = 0.5                          | B = 1.8<br>A = 7.5<br>E = 6.3                                                                      | A = 36.7 (20.0)<br>E = 30.9 (16.9)          | 4                |
| <i>Clostridium ljungdahlii</i>     | DSM 13528                      | 0.5 L chemostat, D = 0.29 day <sup>-1</sup> , 300 rpm, 1.8 L/h 20% CO <sub>2</sub> & 80% H <sub>2</sub> , pH 5.5, 37 °C, DM, n = 3                                                   | μ = 0.29                         | B = 0.2 <sup>e</sup><br>A = 6.3<br>E = 1.8                                                         | A = 1.8<br>E = 0.5                          |                  |
|                                    |                                | DM with NaNO <sub>3</sub> replacing NH <sub>4</sub> Cl, n = 1                                                                                                                        | μ = 0.29                         | B = 0.3 <sup>b,e</sup> (pH 5.5)<br>A = 13.4 <sup>b</sup> (pH 6.0)<br>E = 5.0 <sup>b</sup> (pH 5.0) | A = 3.9<br>E = 1.4                          | 5                |
|                                    |                                | 1 L batch retentostat, D = 0.96 day <sup>-1</sup> , 300 rpm, 7.2 L/h 20% CO <sub>2</sub> & 80% H <sub>2</sub> , pH 5.7, 35 °C, DM, n = 1                                             | μ = 0                            | B = 2.3 <sup>a</sup><br>A = 18.5                                                                   | A = 17.7                                    | 6                |
| <i>Moorella thermoacetica</i>      | ATCC 49707                     | 1 L BCR, D = 2.16 day <sup>-1</sup> , 72 L/h 33% CO <sub>2</sub> & 67% H <sub>2</sub> , pH = 6.0, 60 °C, 10 g/L YE, n = 1                                                            | μ = 0                            | B = 4.1 <sup>a</sup><br>A = 25.0 <sup>a</sup>                                                      | A = 54.0 (13.3) <sup>f</sup>                | 7                |
| <i>Moorella</i> sp.                | HUC22-1                        | 0.5 L semi-continuous with cell retention, 500 rpm, continuous 20% CO <sub>2</sub> & 80% H <sub>2</sub> , 3.6 L/h, pH 6.2, 55 °C, 1 g/L YE, n=1                                      | μ = 0                            | B = 1.5<br>A = 22.0<br>E = 0.3                                                                     | A = 6.9 (10.4)                              | 8                |

# Enhancing CO<sub>2</sub>-valorization using *Clostridium autoethanogenum* for sustainable fuel and chemicals production

655 Thick borders separate organisms, while thin borders separate similar experiments –  
656 for which only differences in conditions are stated following the first experiment.  
657 Bolded experiments are chemostats. Only biomass concentration is given in gDCW/L.

658 Ref. 1 – 8: Kantzow et al., 2015; Hoffmeister et al., 2016; Morinaga and Kawada, 1990;  
659 Mock et al., 2015; (preprint) Klask et al., 2019; Molitor et al., 2019; Hu et al., 2016;  
660 Sakai et al., 2005.

661 Abbreviations: c<sub>Product</sub> – product concentration, D - dilution rate, YE – yeast extract, DM  
662 – defined medium, n – number of replicates, B – biomass, A – acetate, E – ethanol, Ac –  
663 acetone, BCR – bubble column reactor.

664 Notes: <sup>a</sup> estimated from graph, <sup>b</sup> not steady state (represented as maximum), <sup>c</sup> cell  
665 retention membrane was blocked before steady state was reached, <sup>d</sup> calculated using  
666 data from Kantzow et al. (2015), <sup>e</sup> calculated using data from Molitor et al. (2019), <sup>f</sup>  
667 calculated using estimated data.

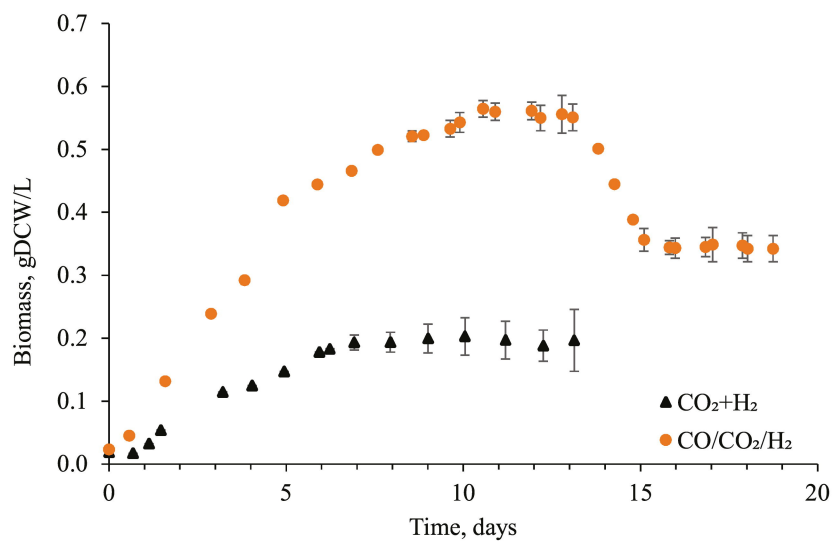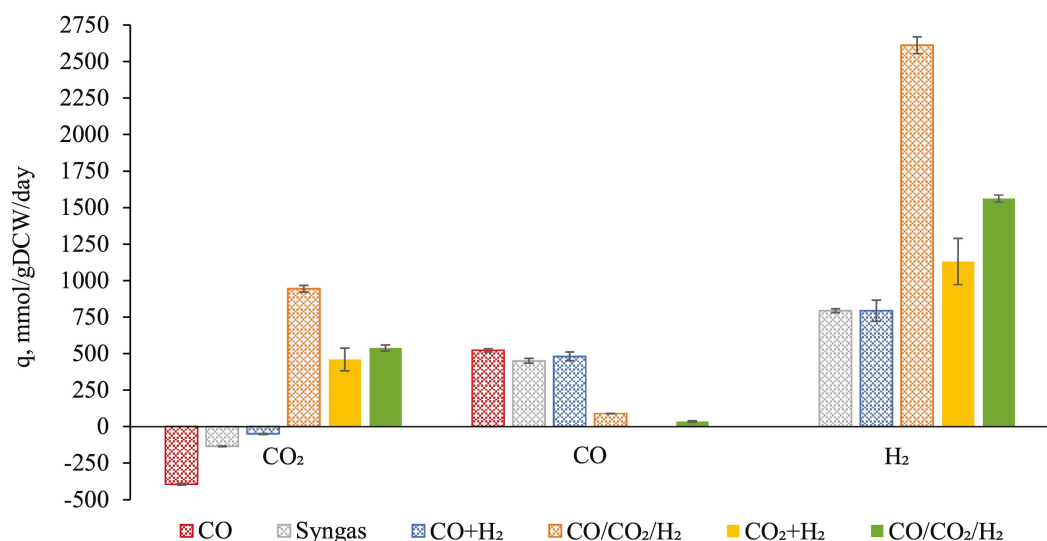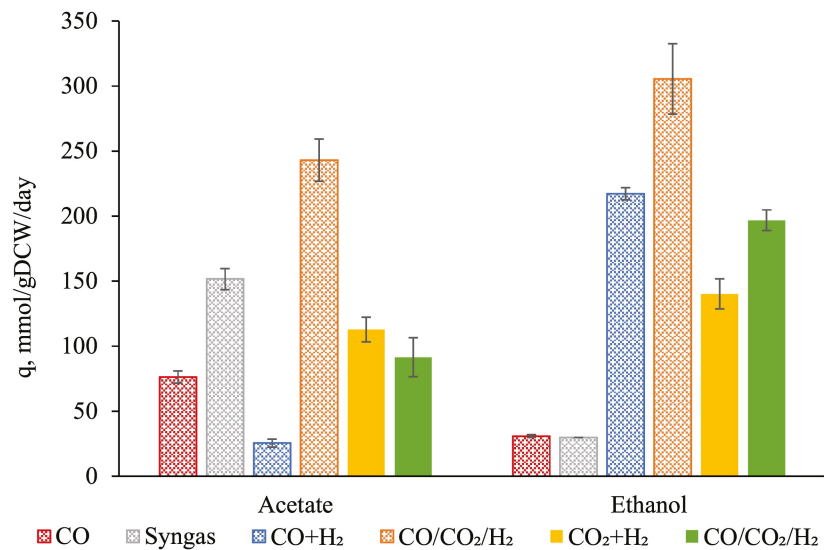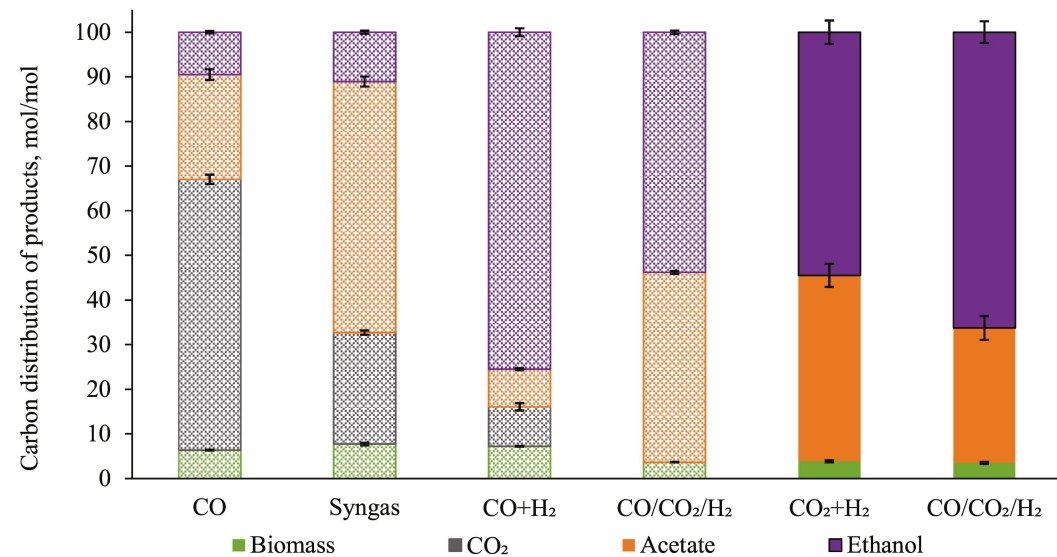



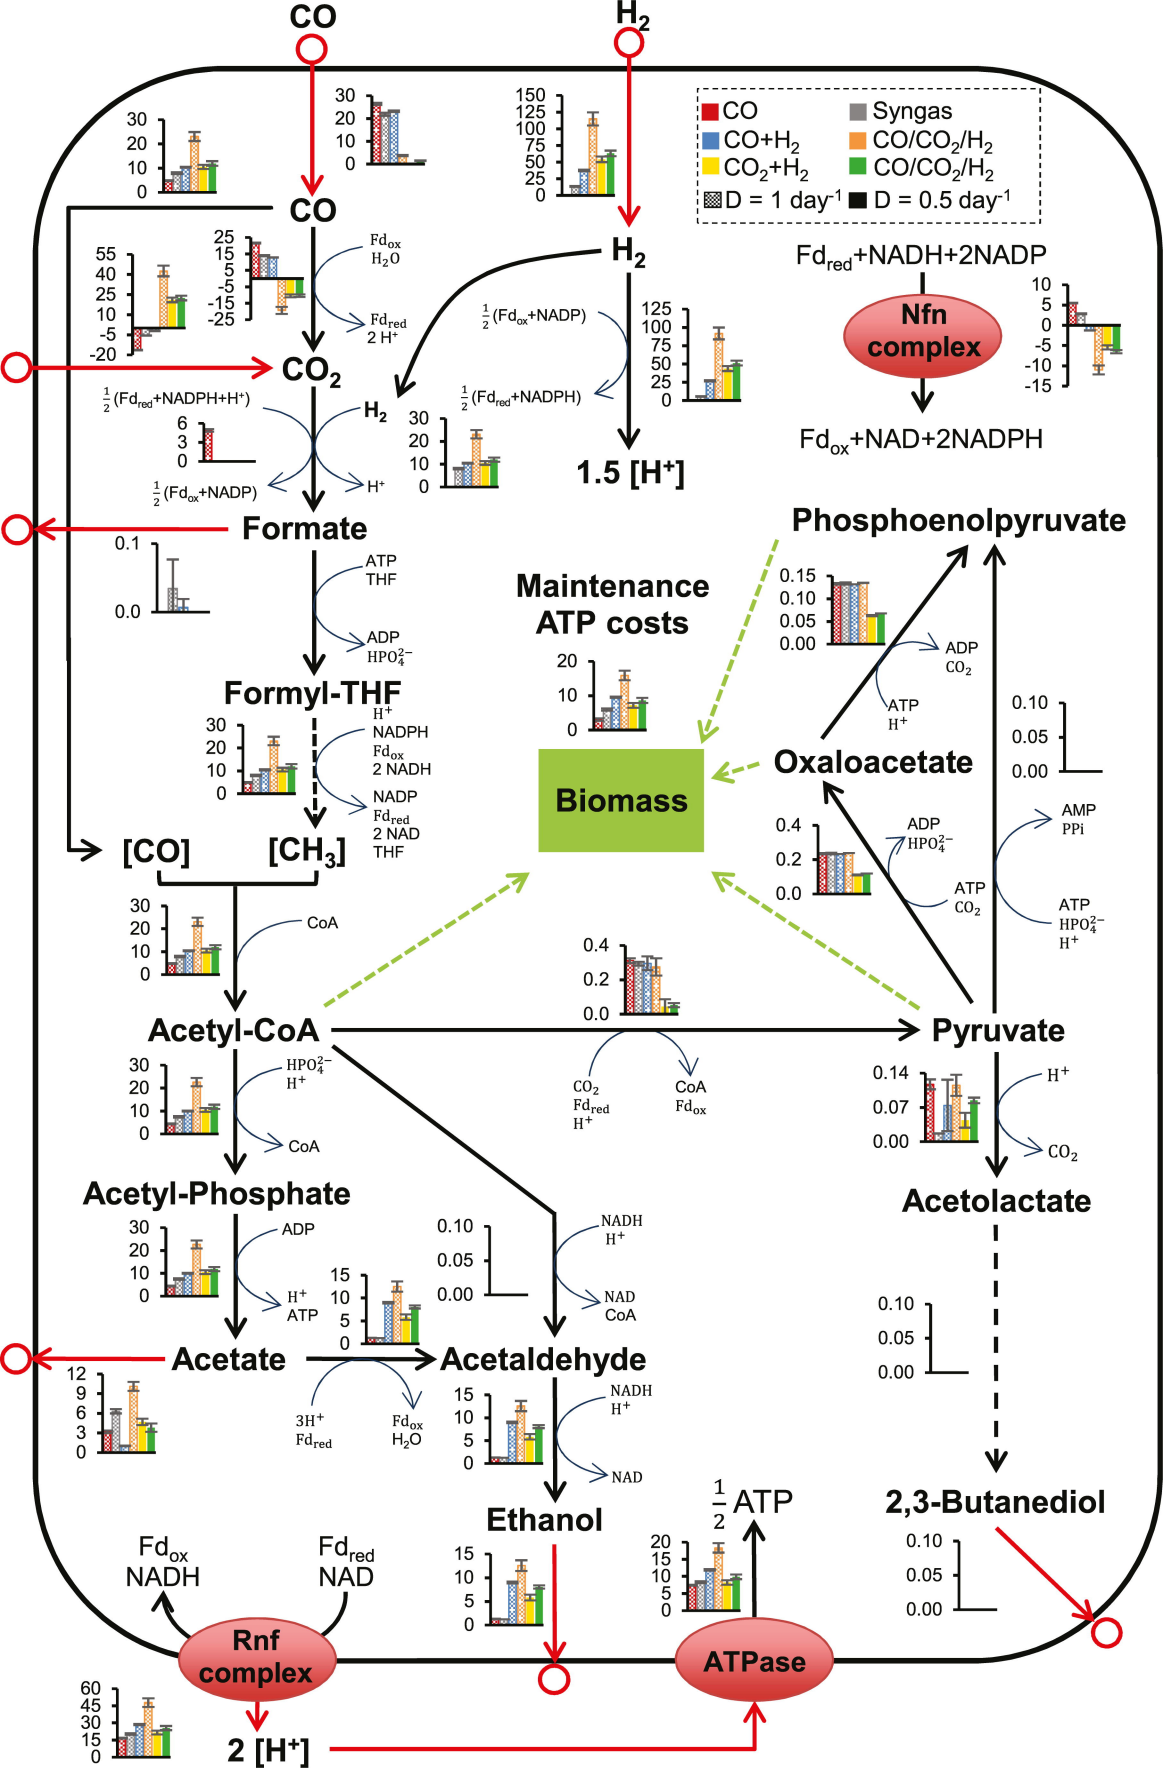

Source: https://www.biorxiv.org/content/biorxiv/early/2020/01/24/2020.01.23.917666.full.pdf
